# Supplementary material for: Shift and Metabolic Potentials of Microbial Eukaryotic Communities Across the Full Depths of the Mariana Trench
Source: Front Microbiol. 2021 Jan 18;11:603692. doi: 10.3389/fmicb.2020.603692 (PMC7848797; doi:10.3389/fmicb.2020.603692)
Supplement: Supplementary file 8 [file Table_1.xlsx]

## Sheet: S1
Table S1 General features of the metagenomic data.
Sample	Clean data (Gb)	Number of contigs	Assembly length (bp)	Longest contig (bp)	Average contig length (bp)	Q30 (%)	N50 (bp)	GC (%)
F0_2016	14.79	401248	533807522	257326	1330	94.12	1580	50.32
P0_2016	16.54	189022	208617148	365904	1103	92.47	1138	52.98
F0_2017	13.26	569664	542535362	284192	952	95.66	955	39.4
P0_2017	12.81	149525	114492222	20219	766	92.29	714	49.75
F20.1_2017	12.32	472127	480650946	387820	1018	85.49	1028	45.44
F20.2_2017	11.85	443231	462294885	190525	1043	88.12	1093	48.45
F40_2016	16.1	392156	666744620	512957	1700	94.44	2639	56.35
P40_2016	16.34	423262	717161825	566681	1694	93.72	2734	57.02
F40_2017	12.57	391966	470748405	459743	1201	87.36	1331	53.2
P40_2017	13.46	300008	411163498	547651	1371	96.91	1691	54.3
F80.1_2017	12.97	430393	527843822	398748	1226	87.96	1384	50.7
F80.2_2017	12.1	429332	555668853	241715	1294	97.03	1504	54.48
F96_2016	14.99	333595	568373836	428605	1703	94.35	2761	54.58
F104_2016	14.61	273226	396765532	467516	1452	94.17	1837	55.08
P104_2016	14.61	218086	373094977	437362	1710	94.12	2747	56.94
F105_2016	13.67	195862	296764305	473676	1515	94.24	2075	54.9
P105_2016	14.86	252918	419364592	533373	1658	93.99	2658	56.48

## Sheet: S2
Table S2 List of KOs used for representing different pathways in this study.
Pathyways	KO_ID	Description
V-type ATPase	K02145	ATPeV1A, ATP6A; V-type H+-transporting ATPase subunit A [EC:7.1.2.2]
	K02147	ATPeV1B, ATP6B; V-type H+-transporting ATPase subunit B
	K02148	ATPeV1C, ATP6C; V-type H+-transporting ATPase subunit C
	K02149	ATPeV1D, ATP6M; V-type H+-transporting ATPase subunit D
	K02150	ATPeV1E, ATP6E; V-type H+-transporting ATPase subunit E
	K02151	ATPeV1F, ATP6S14; V-type H+-transporting ATPase subunit F
	K02152	ATPeV1G, ATP6G; V-type H+-transporting ATPase subunit G
	K02144	ATPeV1H; V-type H+-transporting ATPase subunit H
	K02154	ATPeV0A, ATP6N; V-type H+-transporting ATPase subunit a
	K03661	ATPeV0B, ATP6F; V-type H+-transporting ATPase 21kDa proteolipid subunit
	K02155	ATPeV0C, ATP6L; V-type H+-transporting ATPase 16kDa proteolipid subunit
	K02146	ATPeV0D, ATP6D; V-type H+-transporting ATPase subunit d
	K02153	ATPeV0E, ATP6H; V-type H+-transporting ATPase subunit e
	K03662	ATPeVS1, ATP6S1; V-type H+-transporting ATPase S1 subunit
Photosynthesis	K02689	psaA; photosystem I P700 chlorophyll a apoprotein A1
	K02690	psaB; photosystem I P700 chlorophyll a apoprotein A2
	K02691	psaC; photosystem I subunit VII
	K02692	psaD; photosystem I subunit II
	K02693	psaE; photosystem I subunit IV
	K02694	psaF; photosystem I subunit III
	K02703	psbA; photosystem II P680 reaction center D1 protein [EC:1.10.3.9]
	K02706	psbD; photosystem II P680 reaction center D2 protein [EC:1.10.3.9]
	K02705	psbC; photosystem II CP43 chlorophyll apoprotein
	K02704	psbB; photosystem II CP47 chlorophyll apoprotein
	K02707	psbE; photosystem II cytochrome b559 subunit alpha
	K02708	psbF; photosystem II cytochrome b559 subunit beta
Fatty acid biosynthesis	K11262	ACACA; acetyl-CoA carboxylase / biotin carboxylase 1 [EC:6.4.1.2 6.3.4.14 2.1.3.15]
	K02160	accB, bccP; acetyl-CoA carboxylase biotin carboxyl carrier protein
	K01961	accC; acetyl-CoA carboxylase, biotin carboxylase subunit [EC:6.4.1.2 6.3.4.14]
	K11263	bccA, pccA; acetyl-CoA/propionyl-CoA carboxylase, biotin carboxylase, biotin carboxyl carrier protein [EC:6.4.1.2 6.4.1.3 6.3.4.14]
	K01962	accA; acetyl-CoA carboxylase carboxyl transferase subunit alpha [EC:6.4.1.2 2.1.3.15]
	K01963	accD; acetyl-CoA carboxylase carboxyl transferase subunit beta [EC:6.4.1.2 2.1.3.15]
	K18472	accD6; acetyl-CoA/propionyl-CoA carboxylase carboxyl transferase subunit [EC:6.4.1.2 6.4.1.3 2.1.3.15]
	K00645	fabD, MCAT, MCT1; [acyl-carrier-protein] S-malonyltransferase [EC:2.3.1.39]
	K00648	fabH; 3-oxoacyl-[acyl-carrier-protein] synthase III [EC:2.3.1.180]
	K18473	fabY; acetoacetyl-[acyl-carrier protein] synthase [EC:2.3.1.180]
	K00665	FASN; fatty acid synthase, animal type [EC:2.3.1.85]
	K00667	FAS2; fatty acid synthase subunit alpha, fungi type [EC:2.3.1.86]
	K00668	FAS1; fatty acid synthase subunit beta, fungi type [EC:2.3.1.86]
	K11533	fas; fatty acid synthase, bacteria type [EC:2.3.1.-]
	K00647	fabB; 3-oxoacyl-[acyl-carrier-protein] synthase I [EC:2.3.1.41]
	K09458	fabF, OXSM, CEM1; 3-oxoacyl-[acyl-carrier-protein] synthase II [EC:2.3.1.179]
	K00059	fabG, OAR1; 3-oxoacyl-[acyl-carrier protein] reductase [EC:1.1.1.100]
	K02372	fabZ; 3-hydroxyacyl-[acyl-carrier-protein] dehydratase [EC:4.2.1.59]
	K01716	fabA; 3-hydroxyacyl-[acyl-carrier protein] dehydratase / trans-2-decenoyl-[acyl-carrier protein] isomerase [EC:4.2.1.59 5.3.3.14]
	K16363	lpxC-fabZ; UDP-3-O-[3-hydroxymyristoyl] N-acetylglucosamine deacetylase / 3-hydroxyacyl-[acyl-carrier-protein] dehydratase [EC:3.5.1.108 4.2.1.59]
	K00208	fabI; enoyl-[acyl-carrier protein] reductase I [EC:1.3.1.9 1.3.1.10]
	K02371	fabK; enoyl-[acyl-carrier protein] reductase II [EC:1.3.1.9]
	K10780	fabL; enoyl-[acyl-carrier protein] reductase III [EC:1.3.1.104]
	K00209	fabV, ter; enoyl-[acyl-carrier protein] reductase / trans-2-enoyl-CoA reductase (NAD+) [EC:1.3.1.9 1.3.1.44]
Fatty acid degradation (Beta oxidation)	K01897	ACSL, fadD; long-chain acyl-CoA synthetase [EC:6.2.1.3]
	K15013	ACSBG; long-chain-fatty-acid--CoA ligase ACSBG [EC:6.2.1.3]
	K00232	E1.3.3.6, ACOX1, ACOX3; acyl-CoA oxidase [EC:1.3.3.6]
	K00249	ACADM, acd; acyl-CoA dehydrogenase [EC:1.3.8.7]
	K00255	ACADL; long-chain-acyl-CoA dehydrogenase [EC:1.3.8.8]
	K06445	fadE; acyl-CoA dehydrogenase [EC:1.3.99.-]
	K09479	ACADVL; very long chain acyl-CoA dehydrogenase [EC:1.3.8.9]
	K01692	paaF, echA; enoyl-CoA hydratase [EC:4.2.1.17]
	K07511	ECHS1; enoyl-CoA hydratase [EC:4.2.1.17]
	K13767	fadB; enoyl-CoA hydratase [EC:4.2.1.17]
	K00022	HADH; 3-hydroxyacyl-CoA dehydrogenase [EC:1.1.1.35]
	K07516	fadN; 3-hydroxyacyl-CoA dehydrogenase [EC:1.1.1.35]
	K01825	fadB; 3-hydroxyacyl-CoA dehydrogenase / enoyl-CoA hydratase / 3-hydroxybutyryl-CoA epimerase / enoyl-CoA isomerase [EC:1.1.1.35 4.2.1.17 5.1.2.3 5.3.3.8]
	K01782	fadJ; 3-hydroxyacyl-CoA dehydrogenase / enoyl-CoA hydratase / 3-hydroxybutyryl-CoA epimerase [EC:1.1.1.35 4.2.1.17 5.1.2.3]
	K07514	EHHADH; enoyl-CoA hydratase / 3-hydroxyacyl-CoA dehydrogenase / 3,2-trans-enoyl-CoA isomerase [EC:4.2.1.17 1.1.1.35 5.3.3.8]
	K07515	HADHA; enoyl-CoA hydratase / long-chain 3-hydroxyacyl-CoA dehydrogenase [EC:4.2.1.17 1.1.1.211]
	K10527	MFP2; enoyl-CoA hydratase/3-hydroxyacyl-CoA dehydrogenase [EC:4.2.1.17 1.1.1.35 1.1.1.211]
	K00632	fadA, fadI; acetyl-CoA acyltransferase [EC:2.3.1.16]
	K07513	ACAA1; acetyl-CoA acyltransferase 1 [EC:2.3.1.16]
	K07508	ACAA2; acetyl-CoA acyltransferase 2 [EC:2.3.1.16]
	K07509	HADHB; acetyl-CoA acyltransferase [EC:2.3.1.16]
Gluconeogenesis	K01596	E4.1.1.32, pckA, PCK; phosphoenolpyruvate carboxykinase (GTP) [EC:4.1.1.32]
	K01610	E4.1.1.49, pckA; phosphoenolpyruvate carboxykinase (ATP) [EC:4.1.1.49]
	K01689	ENO, eno; enolase [EC:4.2.1.11]
	K01834	PGAM, gpmA; 2,3-bisphosphoglycerate-dependent phosphoglycerate mutase [EC:5.4.2.11]
	K15633	gpmI; 2,3-bisphosphoglycerate-independent phosphoglycerate mutase [EC:5.4.2.12]
	K15634	gpmB; 2,3-bisphosphoglycerate-dependent phosphoglycerate mutase [EC:5.4.2.11]
	K15635	apgM; 2,3-bisphosphoglycerate-independent phosphoglycerate mutase [EC:5.4.2.12]
	K00927	PGK, pgk; phosphoglycerate kinase [EC:2.7.2.3]
	K00134	GAPDH, gapA; glyceraldehyde 3-phosphate dehydrogenase [EC:1.2.1.12]
	K00150	gap2; glyceraldehyde-3-phosphate dehydrogenase (NAD(P)) [EC:1.2.1.59]
	K01803	TPI, tpiA; triosephosphate isomerase (TIM) [EC:5.3.1.1]
	K01623	ALDO; fructose-bisphosphate aldolase, class I [EC:4.1.2.13]
	K01624	FBA, fbaA; fructose-bisphosphate aldolase, class II [EC:4.1.2.13]
	K11645	fbaB; fructose-bisphosphate aldolase, class I [EC:4.1.2.13]
	K03841	FBP, fbp; fructose-1,6-bisphosphatase I [EC:3.1.3.11]
	K02446	glpX; fructose-1,6-bisphosphatase II [EC:3.1.3.11]
	K11532	glpX-SEBP; fructose-1,6-bisphosphatase II / sedoheptulose-1,7-bisphosphatase [EC:3.1.3.11 3.1.3.37]
	K01086	fbp-SEBP; fructose-1,6-bisphosphatase I / sedoheptulose-1,7-bisphosphatase [EC:3.1.3.11 3.1.3.37]
	K04041	fbp3; fructose-1,6-bisphosphatase III [EC:3.1.3.11]
	K01622	K01622; fructose 1,6-bisphosphate aldolase/phosphatase [EC:4.1.2.13 3.1.3.11]
Glycolysis	K00844	HK; hexokinase [EC:2.7.1.1]
	K12407	GCK; glucokinase [EC:2.7.1.2]
	K00845	glk; glucokinase [EC:2.7.1.2]
	K00886	ppgK; polyphosphate glucokinase [EC:2.7.1.63]
	K08074	ADPGK; ADP-dependent glucokinase [EC:2.7.1.147]
	K01810	GPI, pgi; glucose-6-phosphate isomerase [EC:5.3.1.9]
	K06859	pgi1; glucose-6-phosphate isomerase, archaeal [EC:5.3.1.9]
	K13810	tal-pgi; transaldolase / glucose-6-phosphate isomerase [EC:2.2.1.2 5.3.1.9]
	K15916	pgi-pmi; glucose/mannose-6-phosphate isomerase [EC:5.3.1.9 5.3.1.8]
	K00850	pfkA, PFK; 6-phosphofructokinase 1 [EC:2.7.1.11]
	K16370	pfkB; 6-phosphofructokinase 2 [EC:2.7.1.11]
	K21071	pfk, pfp; ATP-dependent phosphofructokinase / diphosphate-dependent phosphofructokinase [EC:2.7.1.11 2.7.1.90]
	K00918	pfkC; ADP-dependent phosphofructokinase/glucokinase [EC:2.7.1.146 2.7.1.147]
	K01623	ALDO; fructose-bisphosphate aldolase, class I [EC:4.1.2.13]
	K01624	FBA, fbaA; fructose-bisphosphate aldolase, class II [EC:4.1.2.13]
	K11645	fbaB; fructose-bisphosphate aldolase, class I [EC:4.1.2.13]
	K16305	K16305; fructose-bisphosphate aldolase / 6-deoxy-5-ketofructose 1-phosphate synthase [EC:4.1.2.13 2.2.1.11]
	K16306	K16306; fructose-bisphosphate aldolase / 2-amino-3,7-dideoxy-D-threo-hept-6-ulosonate synthase [EC:4.1.2.13 2.2.1.10]
	K01803	TPI, tpiA; triosephosphate isomerase (TIM) [EC:5.3.1.1]
	K00134	GAPDH, gapA; glyceraldehyde 3-phosphate dehydrogenase [EC:1.2.1.12]
	K00150	gap2; glyceraldehyde-3-phosphate dehydrogenase (NAD(P)) [EC:1.2.1.59]
	K00927	PGK, pgk; phosphoglycerate kinase [EC:2.7.2.3]
	K11389	gapor; glyceraldehyde-3-phosphate dehydrogenase (ferredoxin) [EC:1.2.7.6]
	K01834	PGAM, gpmA; 2,3-bisphosphoglycerate-dependent phosphoglycerate mutase [EC:5.4.2.11]
	K15633	gpmI; 2,3-bisphosphoglycerate-independent phosphoglycerate mutase [EC:5.4.2.12]
	K15634	gpmB; 2,3-bisphosphoglycerate-dependent phosphoglycerate mutase [EC:5.4.2.11]
	K15635	apgM; 2,3-bisphosphoglycerate-independent phosphoglycerate mutase [EC:5.4.2.12]
	K01689	ENO, eno; enolase [EC:4.2.1.11]
	K00873	PK, pyk; pyruvate kinase [EC:2.7.1.40]
	K12406	PKLR; pyruvate kinase isozymes R/L [EC:2.7.1.40]
Glyoxylate cycle	K01647	CS, gltA; citrate synthase [EC:2.3.3.1]
	K01681	ACO, acnA; aconitate hydratase [EC:4.2.1.3]
	K01682	acnB; aconitate hydratase 2 / 2-methylisocitrate dehydratase [EC:4.2.1.3 4.2.1.99]
	K01637	E4.1.3.1, aceA; isocitrate lyase [EC:4.1.3.1]
	K01638	aceB, glcB; malate synthase [EC:2.3.3.9]
	K19282	aceB; bifunctional (S)-malyl-CoA lyase/thioesterase [EC:4.1.3.24 3.1.2.30]
	K00026	MDH2; malate dehydrogenase [EC:1.1.1.37]
	K00025	MDH1; malate dehydrogenase [EC:1.1.1.37]
	K00024	mdh; malate dehydrogenase [EC:1.1.1.37]
Biosynthesis of unsaturated fatty acids	K10251	HSD17B12, KAR, IFA38; 17beta-estradiol 17-dehydrogenase / very-long-chain 3-oxoacyl-CoA reductase [EC:1.1.1.62 1.1.1.330]
	K10703	HACD, PHS1, PAS2; very-long-chain (3R)-3-hydroxyacyl-CoA dehydratase [EC:4.2.1.134]
	K10258	TER, TSC13, CER10; very-long-chain enoyl-CoA reductase [EC:1.3.1.93]
	K00507	SCD, desC; stearoyl-CoA desaturase (Delta-9 desaturase) [EC:1.14.19.1]
	K03921	FAB2, SSI2, desA1; acyl-[acyl-carrier-protein] desaturase [EC:1.14.19.2 1.14.19.11 1.14.19.26]
	K03922	desA2; acyl-[acyl-carrier-protein] desaturase [EC:1.14.19.2]
	K22769	desA3; NADPH-dependent stearoyl-CoA 9-desaturase [EC:1.14.19.-]
	K22770	K22770; stearoyl-CoA 9-desaturase NADPH oxidoreductase
	K10256	FAD2; omega-6 fatty acid desaturase / acyl-lipid omega-6 desaturase (Delta-12 desaturase) [EC:1.14.19.6 1.14.19.22]
	K23006	FAD3; omega-3 fatty acid desaturase (Delta-15 desaturase) [EC:1.14.19.-]
	K22993	K22993; bifunctional Delta-12/omega-3 fatty acid desaturase [EC:1.14.19.6 1.14.19.-]
	K10226	FADS2; acyl-CoA 6-desaturase (Delta-6 desaturase) [EC:1.14.19.3]
	K10224	FADS1; acyl-CoA (8-3)-desaturase (Delta-5 desaturase) [EC:1.14.19.44]
	K00232	E1.3.3.6, ACOX1, ACOX3; acyl-CoA oxidase [EC:1.3.3.6]
	K12405	HSD17B4; (3R)-3-hydroxyacyl-CoA dehydrogenase / 3a,7a,12a-trihydroxy-5b-cholest-24-enoyl-CoA hydratase / enoyl-CoA hydratase 2 [EC:1.1.1.- 4.2.1.107 4.2.1.119]
	K07513	ACAA1; acetyl-CoA acyltransferase 1 [EC:2.3.1.16]
	K08764	SCP2, SCPX; sterol carrier protein 2 [EC:2.3.1.176]
	K01068	ACOT1_2_4; acyl-coenzyme A thioesterase 1/2/4 [EC:3.1.2.2]
	K17360	ACOT7; acyl-coenzyme A thioesterase 7 [EC:3.1.2.2]
	K00659	BAAT; bile acid-CoA:amino acid N-acyltransferase [EC:2.3.1.65 3.1.2.2]
	K10804	tesA; acyl-CoA thioesterase I [EC:3.1.2.- 3.1.2.2 3.1.1.2 3.1.1.5]
	K10805	tesB; acyl-CoA thioesterase II [EC:3.1.2.-]
	K10806	yciA; acyl-CoA thioesterase YciA [EC:3.1.2.-]
Lysosomal enzymes	K13289	cathepsin A (carboxypeptidase C) [EC:3.4.16.5]
	K01363	cathepsin B [EC:3.4.22.1]
	K01275	cathepsin C [EC:3.4.14.1]
	K01379	cathepsin D [EC:3.4.23.5]
	K01382	cathepsin E [EC:3.4.23.34]
	K01373	cathepsin F [EC:3.4.22.41]
	K01366	cathepsin H [EC:3.4.22.16]
	K09599	cathepsin P [EC:3.4.22.-]
	K01371	cathepsin K [EC:3.4.22.38]
	K01365	cathepsin L [EC:3.4.22.15]
	K01374	cathepsin O [EC:3.4.22.42]
	K01368	cathepsin S [EC:3.4.22.27]
	K08569	cathepsin W [EC:3.4.22.-]
	K08568	cathepsin X [EC:3.4.18.1]
	K01288	KEX1; carboxypeptidase D [EC:3.4.16.6]
	K06002	PGA; pepsin A [EC:3.4.23.1]
	K01285	PRCP; lysosomal Pro-X carboxypeptidase [EC:3.4.16.2]
	K09646	SCPEP1; serine carboxypeptidase 1 [EC:3.4.16.-]
	K16296	SCPL-I; serine carboxypeptidase-like clade I [EC:3.4.16.-]
	K16297	SCPL-II; serine carboxypeptidase-like clade II [EC:3.4.16.-]
	K16298	SCPL-IV; serine carboxypeptidase-like clade IV [EC:3.4.16.-]
Urea cycle	K01948	CPS1; carbamoyl-phosphate synthase (ammonia) [EC:6.3.4.16]
	K00611	OTC, argF, argI; ornithine carbamoyltransferase [EC:2.1.3.3]
	K01940	argG, ASS1; argininosuccinate synthase [EC:6.3.4.5]
	K01755	argH, ASL; argininosuccinate lyase [EC:4.3.2.1]
	K14681	argHA; argininosuccinate lyase / amino-acid N-acetyltransferase [EC:4.3.2.1 2.3.1.1]
	K01476	E3.5.3.1, rocF, arg; arginase [EC:3.5.3.1]
TCA cycle	K01647	CS, gltA; citrate synthase [EC:2.3.3.1]
	K05942	E2.3.3.3; citrate (Re)-synthase [EC:2.3.3.3]
	K01681	ACO, acnA; aconitate hydratase [EC:4.2.1.3]
	K01682	acnB; aconitate hydratase 2 / 2-methylisocitrate dehydratase [EC:4.2.1.3 4.2.1.99]
	K00031	IDH1, IDH2, icd; isocitrate dehydrogenase [EC:1.1.1.42]
	K00030	IDH3; isocitrate dehydrogenase (NAD+) [EC:1.1.1.41]
	K00164	OGDH, sucA; 2-oxoglutarate dehydrogenase E1 component [EC:1.2.4.2]
	K00658	DLST, sucB; 2-oxoglutarate dehydrogenase E2 component (dihydrolipoamide succinyltransferase) [EC:2.3.1.61]
	K00382	DLD, lpd, pdhD; dihydrolipoamide dehydrogenase [EC:1.8.1.4]
	K00174	korA, oorA, oforA; 2-oxoglutarate/2-oxoacid ferredoxin oxidoreductase subunit alpha [EC:1.2.7.3 1.2.7.11]
	K00175	korB, oorB, oforB; 2-oxoglutarate/2-oxoacid ferredoxin oxidoreductase subunit beta [EC:1.2.7.3 1.2.7.11]
	K00177	korC, oorC; 2-oxoglutarate ferredoxin oxidoreductase subunit gamma [EC:1.2.7.3]
	K00176	korD, oorD; 2-oxoglutarate ferredoxin oxidoreductase subunit delta [EC:1.2.7.3]
	K01902	sucD; succinyl-CoA synthetase alpha subunit [EC:6.2.1.5]
	K01903	sucC; succinyl-CoA synthetase beta subunit [EC:6.2.1.5]
	K01899	LSC1; succinyl-CoA synthetase alpha subunit [EC:6.2.1.4 6.2.1.5]
	K01900	LSC2; succinyl-CoA synthetase beta subunit [EC:6.2.1.4 6.2.1.5]
	K18118	aarC, cat1; succinyl-CoA:acetate CoA-transferase [EC:2.8.3.18]
	K00234	SDHA, SDH1; succinate dehydrogenase (ubiquinone) flavoprotein subunit [EC:1.3.5.1]
	K00235	SDHB, SDH2; succinate dehydrogenase (ubiquinone) iron-sulfur subunit [EC:1.3.5.1]
	K00236	SDHC, SDH3; succinate dehydrogenase (ubiquinone) cytochrome b560 subunit
	K00237	SDHD, SDH4; succinate dehydrogenase (ubiquinone) membrane anchor subunit
	K00239	sdhA, frdA; succinate dehydrogenase / fumarate reductase, flavoprotein subunit [EC:1.3.5.1 1.3.5.4]
	K00240	sdhB, frdB; succinate dehydrogenase / fumarate reductase, iron-sulfur subunit [EC:1.3.5.1 1.3.5.4]
	K00241	sdhC, frdC; succinate dehydrogenase / fumarate reductase, cytochrome b subunit
	K00242	sdhD, frdD; succinate dehydrogenase / fumarate reductase, membrane anchor subunit
	K18859	sdhD, frdD; succinate dehydrogenase / fumarate reductase, subunit D
	K18860	sdhD, frdD; putative succinate dehydrogenase / fumarate reductase, subunit D
	K00244	frdA; fumarate reductase flavoprotein subunit [EC:1.3.5.4]
	K00245	frdB; fumarate reductase iron-sulfur subunit [EC:1.3.5.4]
	K00246	frdC; fumarate reductase subunit C
	K00247	frdD; fumarate reductase subunit D
	K01676	E4.2.1.2A, fumA, fumB; fumarate hydratase, class I [EC:4.2.1.2]
	K01679	E4.2.1.2B, fumC, FH; fumarate hydratase, class II [EC:4.2.1.2]
	K01677	E4.2.1.2AA, fumA; fumarate hydratase subunit alpha [EC:4.2.1.2]
	K01678	E4.2.1.2AB, fumB; fumarate hydratase subunit beta [EC:4.2.1.2]
	K00026	MDH2; malate dehydrogenase [EC:1.1.1.37]
	K00025	MDH1; malate dehydrogenase [EC:1.1.1.37]
	K00024	mdh; malate dehydrogenase [EC:1.1.1.37]
	K00116	mqo; malate dehydrogenase (quinone) [EC:1.1.5.4]
Calvin cycle	K00855	PRK, prkB; phosphoribulokinase [EC:2.7.1.19]
	K01601	rbcL; ribulose-bisphosphate carboxylase large chain [EC:4.1.1.39]
	K01602	rbcS; ribulose-bisphosphate carboxylase small chain [EC:4.1.1.39]
	K00927	PGK, pgk; phosphoglycerate kinase [EC:2.7.2.3]
	K05298	GAPA; glyceraldehyde-3-phosphate dehydrogenase (NADP+) (phosphorylating) [EC:1.2.1.13]
	K00150	gap2; glyceraldehyde-3-phosphate dehydrogenase (NAD(P)) [EC:1.2.1.59]
	K00134	GAPDH, gapA; glyceraldehyde 3-phosphate dehydrogenase [EC:1.2.1.12]
	K01623	ALDO; fructose-bisphosphate aldolase, class I [EC:4.1.2.13]
	K01624	FBA, fbaA; fructose-bisphosphate aldolase, class II [EC:4.1.2.13]
	K03841	FBP, fbp; fructose-1,6-bisphosphatase I [EC:3.1.3.11]
	K02446	glpX; fructose-1,6-bisphosphatase II [EC:3.1.3.11]
	K11532	glpX-SEBP; fructose-1,6-bisphosphatase II / sedoheptulose-1,7-bisphosphatase [EC:3.1.3.11 3.1.3.37]
	K01086	fbp-SEBP; fructose-1,6-bisphosphatase I / sedoheptulose-1,7-bisphosphatase [EC:3.1.3.11 3.1.3.37]
	K00615	E2.2.1.1, tktA, tktB; transketolase [EC:2.2.1.1]
	K01100	E3.1.3.37; sedoheptulose-bisphosphatase [EC:3.1.3.37]
	K01807	rpiA; ribose 5-phosphate isomerase A [EC:5.3.1.6]
	K01808	rpiB; ribose 5-phosphate isomerase B [EC:5.3.1.6]
Nitrate reduction (assimilatory)	K00367	narB; ferredoxin-nitrate reductase [EC:1.7.7.2]
	K10534	NR; nitrate reductase (NAD(P)H) [EC:1.7.1.1 1.7.1.2 1.7.1.3]
	K00372	nasA; assimilatory nitrate reductase catalytic subunit [EC:1.7.99.-]
	K00360	nasB; assimilatory nitrate reductase electron transfer subunit [EC:1.7.99.-]
	K00366	nirA; ferredoxin-nitrite reductase [EC:1.7.7.1]
	K17877	NIT-6; nitrite reductase (NAD(P)H) [EC:1.7.1.4]

## Sheet: S3
Table S3 Differentiation between surface, bathypelagic and hadal communities tested with ANOSIM analyses using 1,000 permutations based on bray-curtis distance. See main text Figure 1A.
group	distance	R2	p-value	Sig
Surface/Bathypelagic	Bray-Curtis	0.43849	0.012	*
Surface/Hadal	Bray-Curtis	1	0.002	**
Bathypelagic/Hadal	Bray-Curtis	0.40145	0.005	**
Surface/Deep (Bathypelagic and Hadal)	Bray-Curtis	0.67811	0.001	**

## Sheet: S4
Table S4 Differentiation between surface, bathypelagic and hadal communities tested with ANOSIM analyses using 1,000 permutations based on Bray-Curtis distance. See main text Figure 4A.
group	distance	R2	p-value	Sig
Surface/Bathypelagic	Bray-Curtis	0.55555	0.006	**
Surface/Hadal	Bray-Curtis	0.86507	0.001	**
Bathypelagic/Hadal	Bray-Curtis	0.23148	0.053
Surface/Deep (Bathypelagic and Hadal)	Bray-Curtis	0.69551	0.001	**

## Sheet: S5
Table S5 Abundances (CPM: copies per million reads) of selected pathways used in this study (generating main text Figure 4C).
Pathway	Surface_average	Bathypelagic_average	Hadal_average	F0_2016	P0_2016	F0_2017	P0_2017	F20.1_2017	F20.2_2017	F40_2016	P40_2016	F40_2017	P40_2017	F80.1_2017	F80.2_2017	F96_2016	F104_2016	P104_2016	F105_2016	P105_2016
Photosynthesis	29265	4325.24	552.557	27505.1	21046.1	46871.9	21636.9	21078.4	1226.95	549.21	2765.2	285.136	46.6092	792.555	793.348	1180.48	408.962	171.833	371.565	149.154
Calvin_cycle	6773.09	10501.5	9132.92	7082.61	8254.52	8634.59	3120.64	15106.7	16045.2	12057.4	6882.07	7956.91	4960.7	10108.9	9352.65	14952.5	7045.84	3929.38	9154.24	9387.03
Glycolysis	9419.96	13639.4	18118.7	9328.14	11583.7	12925.3	3842.75	13258.2	19770	14975.2	9965.25	14527.6	9340.2	18109.6	16031.5	18173.7	18567.3	12802.8	24991.2	18154.4
Gluconeogenesis	9214.17	11632	15571.4	9113.46	10607.7	12895	4240.55	11525.1	16361.1	12735.3	9059.15	12635.9	7475.19	14858.2	12898.2	17655.9	15135	10566.8	21871.2	16014.6
Glyoxylate_cycle	2717.05	6491.21	13659.3	3586.99	4898.71	1572.5	809.99	5180.59	10193.7	8219.04	4113.26	6274.8	4965.89	8670.79	13524.9	7090.99	18701.9	13393.4	22148.4	12084.5
TCA_cycle	14927.1	16421.1	19678.8	17201.6	20763.4	17269.6	4473.96	19061.4	23524.3	21788.2	10127.5	14995.5	9029.55	22027.6	24916.2	18586.1	20352.8	10802.4	22993.7	18072.7
Fatty_acid_biosynthesis	14636.6	6786.61	6600.83	18598.7	11706	23446.8	4794.92	13617.4	8690.1	7110.73	3338.7	4498.85	3463.91	7544.85	10188.5	7939.59	6077.5	1362.2	7674.8	5418.29
Fatty_acid_degradation	10790.3	12293.1	17154.1	11953.9	11370.2	13213	6624.2	12911.9	15963.7	12744.6	9879.18	13934.3	8325.25	21274.4	19546.7	16310.6	17851	8817.97	22152.5	14125.2
Biosynthesis_of_unsaturated_fatty_acids	70.5261	487.208	567.454	66.6026	45.012	73.335	97.1548	66.6293	58.3709	315.963	510.216	778.133	1193.93	875.594	623.204	595.783	360.225	832.993	283.946	400.43
Nitrate_reduction	272.601	834.29	953.727	399.467	165.835	282.58	242.52	622.548	647.973	500.682	1062.28	854.45	1317.81	948.373	1024.97	2186.05	276.571	482.201	495.202	1262.73
Urea_cycle	1510.02	3242.5	4390.8	1185.66	2418.73	845.445	1590.24	2822.7	5415.1	3555.5	3212.75	2892.53	1556.4	6530.58	5395.06	5913.92	3405.54	1761.32	5026.29	2702.92
Lysosomal enzymes	87.1513	820.902	575.323	38.2646	88.1439	46.9833	175.214	134.087	107.551	64.9066	1872.19	1390.97	1355.7	190.901	247.627	600.767	271.913	1432.22	382.411	901.421
V_type_ATPase	63.0654	273.52	186.887	0.412965	0.885571	0.193535	250.77	10.0247	10.1596	29.8507	240.155	507.37	843.562	135.069	66.912	128.657	111.309	563.412	54.8005	248.047

## Sheet: S6
Table S6 Results of wilcoxon test based on gene abundances (CPM) of pathways among three layers. Significant p-values are in bold (p < 0.05). See main text Figure 4C.
Pathway	Surface/Bathypelagic	Surface/Hadal	Bathypelagic/Hadal
Photosynthesis	0.009524	0.00303	0.2226
Calvin cycle	0.2381	0.08182	0.3654
Glycolysis	0.05714	0.006061	0.0507
Gluconeogenesis	0.3048	0.02121	0.03671
Glyoxylate cycle	0.009524	0.00303	0.004079
TCA cycle	0.381	0.08182	0.183
Fatty acid biosynthesis	0.05714	0.08182	0.4178
Fatty acid degradation	0.2381	0.02121	0.01748
Biosynthesis of unsaturated fatty acids	0.08571	0.00303	0.2669
Nitrate reduction	0.004762	0.01212	0.4178
Urea cycle	0.01905	0.006061	0.183
Lysosomal enzymes	0.05714	0.00303	0.4178
V-type ATPase	0.05714	0.08182	0.3654

## Sheet: S7
Table S7 Abundances of genes involved in the carbohydrate metabolism across all the depths. Hmmer, Hotpep and Diamond were applied to predict related genes, and only genes identified by >= 2 tools were retained (generating main text Figure 5).
Gene ID	HMMER	Hotpep	DIAMOND	enzyme families	F0_2016	P0_2016	F0_2017	P0_2017	F20.1_2017	F20.2_2017	F40_2016	P40_2016	F40_2017	P40_2017	F80.1_2017	F80.2_2017	F96_2016	F104_2016	P104_2016	F105_2016	P105_2016
Q0U591_31084061|contig-119_110048|-|407|8.35e-113|1|195|1301|1301[1301]:195[195]:1107[1107]	AA3_1	AA3	AA3_1	AA	0	0	0	0	0	0	1.70416	6.73418	0	0	0	0	0.569536	0	0	0	0
A0A0F4YSZ0_35378088|contig-119_82229|+|424|6.37e-118|1|261|1634|261[261]:1634[1634]:1374[1374]	AA3_2	AA3	AA3_2	AA	0.375169	1.71156	0	0	0	0	1.29707	6.92599	0	0	0	0.404312	0	0	0	0	0
A0A1S3C9R5_32575236|contig-119_76730|+|227|1.28e-58|3|326|1072|326[326]:367[367]:42[42]|649[649]:939[939]:291[291]|1019[1025]:1072[1072]:54[48]	AA6	AA6	N	AA	0	0	0	0	0	0	0	3.66333	11.3368	19.9107	3.93882	0	13.1039	0	18.9478	0	12.4025
K3WM07_24226651|contig-119_3246|+|329|2.524e-89|5|7557|9122|7557[7557]:7640[7640]:84[84]|7777[7786]:7908[7908]:132[123]|8179[8185]:8322[8322]:144[138]|8682[8682]:8774[8774]:93[93]|9024[9033]:9122[9122]:99[90]	AA6	AA6	N	AA	0	0	0	0	0	0	0	9.39761	0	0	0	0	0	0	0	0	0
A0A1S3C9R5_32575236|contig-119_59075|+|249|3.051e-65|4|623|1307|623[623]:769[769]:147[147]|811[832]:936[936]:126[105]|1013[1013]:1174[1174]:162[162]|1254[1260]:1307[1307]:54[48]	AA6	AA6	N	AA	0	0	0	0	0	0	0	0	5.98112	9.78583	2.23036	5.34534	0	0	1.25397	0	1.79522
A0A135V6R4_38902346|contig-119_126241|-|293|1.734e-78|1|611|1189|1189[1189]:611[611]:579[579]	AA9	AA9	N	AA	0	0	0	0	0	0	4.49219	9.14615	0	0	0	0	0	0	0	0	0
E1Z4A3_5161628|contig-119_5434|-|411|5.219e-114|5|4454|6324|6324[6324]:6247[6247]:78[78]|6029[6059]:5742[5742]:288[258]|5411[5411]:5304[5304]:108[108]|5054[5057]:4878[4878]:177[174]|4627[4627]:4454[4454]:174[174]	GH5_7	CBM1+CBM27	N	CBM	0	0	0	0	0	0	0	2.31601	0	0	0	0	0	0	0	0	0
MMETSP1107_Transcript_12751_33267246|contig-119_31244|-|378|4.483e-104|1|70|1617|1617[1617]:70[70]:1548[1548]	CBM20	CBM20	N	CBM	0	0	0	0	0	0	0	0.314838	1.20321	7.07099	0.859956	0	8.4439	2.21951	13.8977	1.35977	9.04636
MMETSP0104_Transcript_1993_28540026|P4_k87_268415_1_2565|-|524|5.025e-148|1|17|2338|2338[2338]:17[17]:2322[2322]	CBM20	CBM20	GT20	CBM	0	0	0	0	0.220339	0.281496	0	0	5.409	5.75835	3.54888	2.34618	1.3587	1.04938	4.22721	0.757812	2.54705
MMETSP0104_Transcript_1993_28540026|F4_k87_404462_1_6575|-|752|1.165e-216|1|569|3802|3802[3802]:569[569]:3234[3234]	CBM20	CBM20	GT20	CBM	0	0	0	0	0	0	0	0	5.5957	4.90173	1.19287	0.882911	1.02283	0.891424	4.0893	1.01546	2.68701
MMETSP0463_Transcript_20917_32896674|P4_k87_1324778_1_2327|-|345|3.851e-94|4|87|886|886[886]:836[836]:51[51]|777[777]:496[496]:282[282]|455[470]:318[318]:138[123]|230[230]:87[87]:144[144]	GH13_1	CBM20	N	CBM	0	0	0	0	0	0	0	0	0	1.50564	0	0	0	0	0	0	0
I0Z6G9_19627532|contig-119_11957|-|505|2.635e-142|4|123|1455|1455[1455]:1390[1390]:66[66]|1183[1186]:959[959]:225[222]|823[826]:536[536]:288[285]|389[392]:123[123]:267[264]	GH43_24	CBM32	N	CBM	0	0	0	0	0	0	0	14.9222	0	0	0	0	0	0	0	0	0
I0Z6G9_19627532|contig-119_1894|-|511|4.117e-144|5|1262|3108|3108[3108]:3043[3043]:66[66]|2913[2913]:2689[2689]:225[225]|2537[2540]:2253[2253]:285[282]|1973[1973]:1689[1689]:285[285]|1387[1390]:1262[1262]:126[123]	GH43_24	CBM32	N	CBM	0	0	0	0	0	0	0	5.0979	0	0	0	0	0	0	0	0	0
MMETSP1391_Transcript_16402_12214769|contig-119_3558|+|1780|0|23|4022|13961|4022[4022]:4126[4126]:105[105]|4246[4249]:4326[4326]:81[78]|4440[4440]:4547[4547]:108[108]|4685[4688]:4906[4906]:222[219]|5123[5123]:5206[5206]:84[84]|5526[5526]:5669[5669]:144[144]|6509[6509]:6760[6760]:252[252]|6984[6984]:7115[7115]:132[132]|7362[7380]:7547[7547]:186[168]|7819[7819]:7965[7965]:147[147]|8439[8439]:8657[8…	CBM45	CBM45	CBM45	CBM	0	0	0	0	0	0	0	4.92789	0	0	0	0	0	0	0	0	0
MMETSP0817_Transcript_20942_1484507|contig-119_6737|-|669|1.127e-191|7|2669|5252|5252[5252]:5049[5049]:204[204]|4782[4785]:4612[4612]:171[168]|4371[4377]:4240[4240]:132[126]|3997[4000]:3767[3767]:231[228]|3548[3548]:3429[3429]:120[120]|3263[3293]:3078[3078]:186[156]|2809[2812]:2669[2669]:141[138]	GH13_6	CBM45	CBM45+GH13_6	CBM	0	0	0	0	0	0	0.820261	6.01558	0	0	0	0	0	0	0	0	0
I0YVN3_31043157|contig-119_9882|+|991|1.319e-288|6|6156|8664|6156[6156]:6431[6431]:276[276]|6666[6669]:6914[6914]:249[246]|7154[7154]:7321[7321]:168[168]|7446[7449]:7895[7895]:450[447]|8058[8061]:8300[8300]:243[240]|8494[8494]:8664[8664]:171[171]	GH13_6	CBM45	N	CBM	0	0	0	0	0	0	0	7.87095	0	0	0	0	0	0	0	0	0
ERR1719183_2180795|contig-119_2653|+|1435|0|14|12352|17748|12352[12352]:12465[12465]:114[114]|12545[12560]:12685[12685]:141[126]|12777[12786]:12950[12950]:174[165]|13384[13384]:13545[13545]:162[162]|13748[13748]:13864[13864]:117[117]|14296[14296]:14451[14451]:156[156]|14622[14640]:14843[14843]:222[204]|15018[15021]:15497[15497]:480[477]|15720[15720]:15956[15956]:237[237]|16194[16197]:16433[16433]…	CBM53	GT5+CBM53	CBM53+GT5	CBM	0	0	0	0	0	0	0	6.30204	0	0	0	0	0	0	0	0	0
ERR1719409_941888|contig-119_7514|-|1002|6.439e-292|10|4714|8636|8636[8636]:8397[8397]:240[240]|8154[8154]:7972[7972]:183[183]|7735[7741]:7625[7625]:111[105]|7355[7355]:7188[7188]:168[168]|6858[6858]:6679[6679]:180[180]|6497[6500]:6390[6390]:108[105]|6141[6144]:5920[5920]:222[219]|5645[5651]:5469[5469]:177[171]|5234[5237]:5073[5073]:162[159]|4842[4845]:4714[4714]:129[126]	CBM53	GT5+CBM53	CBM53+GT5	CBM	0	0	0	0	0	0	0	6.03113	0	0	0	0	0	0	0	0	0
ERR1719487_1117431|contig-119_3491|+|125|6.488e-28|3|8405|9281|8405[8405]:8650[8650]:246[246]|8815[8815]:9063[9063]:249[249]|9198[9198]:9281[9281]:84[84]	CE2	CE2	N	CE	0	0	0	0	0	0	0	0	1.84671	0.937479	0	4.69153	0	0	6.22095	3.426	6.21256
ERR1719487_1117431|F8.1_k87_3139798_1_1597|-|138|7.92e-32|3|143|1019|1019[1019]:687[687]:333[333]|609[621]:361[361]:249[237]|226[226]:143[143]:84[84]	CE2	CE2	N	CE	0	0	0	0	1.26013	0	0	0	4.06675	16.4374	5.20449	0	6.22623	0	7.76349	2.27244	2.18655
I0YJR8_36063059|P4_k87_2293906_1_1353|-|259|2.979e-68|2|259|1156|1156[1156]:464[464]:693[693]|339[348]:259[259]:81[72]	CE2	CE2	N	CE	0	0	0	0	0	0	0	0	0	4.33804	0	0	0	0	0	0	0
F7VNW6_25547901|contig-119_57813|-|319|2.584e-86|1|922|1521|1521[1521]:922[922]:600[600]	CE3	CE3	N	CE	0	0	0	0	0	0	2.10887	7.33854	0	0	0	0	1.45036	0	0	0	0
ERR1719431_2027317|contig-119_93768|-|305|4.234e-82|2|0|990|990[990]:295[295]:696[696]|239[242]:0[0]:240[237]	CE9	CE9	N	CE	0	0	0	0	0	0	2.14234	0.607533	0	0	0	0	4.31703	1.07179	0	0.98132	2.08246
MMETSP1326_Transcript_15206_6498763|contig-119_40084|+|634|3.871e-181|8|275|2858|275[275]:412[412]:138[138]|590[593]:736[736]:147[144]|879[882]:1040[1040]:162[159]|1191[1191]:1403[1403]:213[213]|1607[1628]:1699[1699]:93[72]|1931[1931]:2077[2077]:147[147]|2303[2303]:2548[2548]:246[246]|2772[2772]:2858[2858]:87[87]	GH13_6	CBM26+CBM45	GH13_6	GH	0.441761	0	0	0	0	0	0	6.8809	0	0	0	0	0.509155	0	0	0	0
MMETSP0758_Transcript_9510_20457767|contig-119_19028|+|171|9.221e-42|1|15|710|15[15]:710[710]:696[696]	GH18	GH0	N	GH	0	0	0	0	0	1.44072	0	0	0	9.2477	5.08774	0	10.025	5.8271	9.84462	3.88103	11.3113
MMETSP0758_Transcript_9510_20457767|F4_k87_583657_1_13622|-|224|1.024e-57|1|4358|5341|5341[5341]:4358[4358]:984[984]	GH18	GH0	N	GH	0	0	0	0	0.651695	0	0	0	12.2199	15.2767	1.94676	3.0153	4.09609	0	16.6543	1.31085	1.09769
MMETSP0758_Transcript_9510_20457767|P4_k87_2177945_1_3628|+|317|1.034e-85|5|1134|2332|1134[1134]:1256[1256]:123[123]|1313[1316]:1429[1429]:117[114]|1547[1547]:1831[1831]:285[285]|1904[1904]:2179[2179]:276[276]|2237[2240]:2332[2332]:96[93]	GH18	GH0	N	GH	0	0	0	0	0	0	0	0	0	0.378075	0	0	0	0	0	0	0
A0A1F9ASL8_8202003|contig-119_30821|-|372|2.869e-102|5|115|2003|2003[2003]:1911[1911]:93[93]|1664[1664]:1437[1437]:228[228]|1142[1145]:957[957]:186[183]|742[742]:602[602]:141[141]|240[240]:115[115]:126[126]	GH1	GH1	N	GH	0	0	0	0	0	0	0	8.84898	0	0	0	0	0	0	0	0	0
M5W1M3_7369982|contig-119_1166|-|663|7.211e-190|8|9103|11570|11570[11570]:11397[11397]:174[174]|11295[11295]:11185[11185]:111[111]|11065[11071]:10895[10895]:171[165]|10676[10679]:10485[10485]:192[189]|10222[10225]:9977[9977]:246[243]|9745[9745]:9554[9554]:192[192]|9423[9423]:9331[9331]:93[93]|9195[9198]:9103[9103]:93[90]	GH1	GH1	GH1	GH	0	0	0	0	0	0	0	5.30142	0	0	0	0	0.482787	0	0	0	0
H6SIW2_19334368|F8.1_k87_1423116_1_6469|-|447|7.594e-125|1|2086|2970|2970[2970]:2086[2086]:885[885]	GH103	GH103	GH103	GH	0	0	1.03688	0	11.4313	44.5148	0	0	5.56375	2.29199	37.8943	45.3463	0	0	0	0	0
H6SIW2_19334368|F8.2_k87_2117004_1_1393|+|453|1.187e-126|1|316|1200|316[316]:1200[1200]:885[885]	GH103	GH103	GH103	GH	0	0	4.14751	0	6.85875	14.1524	0	0	2.2255	3.81998	20.2103	20.8147	0	0	0	0	0
MMETSP0104_Transcript_1999_8101003|P4_k87_199572_1_1361|+|446|1.519e-124|1|158|1342|158[158]:1342[1342]:1185[1185]	GH116	GH116	N	GH	0	0	0	0	0	0	0	0	1.10279	5.78485	0	0	0	0	0.272041	0.713245	0
ERR1712137_717516|P4_k87_2239931_1_1637|+|316|2.067e-85|2|3|523|3[3]:197[197]:195[195]|248[254]:523[523]:276[270]	GH125	GH125	N	GH	0	0	0	0	0	0	0	0	0	1.37274	0	0	0	0	0	0	0
MMETSP0202_Transcript_50005_33960423|F4_k87_565412_1_3334|+|247|1.22e-64|1|2666|3331|2666[2666]:3331[3331]:666[666]	GH125	GH125	N	GH	0	0	0	0	0	0	0	0	16.6288	12.6191	0	1.19053	1.18475	0	2.57492	0	0.918389
MMETSP0661_Transcript_25384_8322988|contig-119_6138|+|529|1.57e-149|1|5708|7048|5708[5708]:7048[7048]:1341[1341]	GH125	GH125	N	GH	0	0.88201	0.29272	0	1.71235	0	0.668265	1.50309	11.0353	11.2077	1.42223	3.43755	5.34643	5.55793	20.5044	5.49068	9.65323
MMETSP0699_Transcript_16786_5536269|P4_k87_1304719_1_1662|+|705|1.64e-202|1|360|1622|360[360]:1622[1622]:1263[1263]	GH125	GH125	GH125	GH	0	0	0	0	0	0	0	0	0.675593	4.851	0	0	0	0	0	0	0
MMETSP0661_Transcript_25384_8322988|P4_k87_2197570_1_1717|+|554|4.68e-157|3|313|1714|313[313]:513[513]:201[201]|564[573]:1505[1505]:942[933]|1553[1562]:1714[1714]:162[153]	GH125	GH125	GH125	GH	0	0	0	0	0	0	0	0	0	3.38016	0	0	0	0	0	0	0
MMETSP0369_Transcript_43253_15279581|contig-119_588|-|1026|3.838e-299|14|4887|11278|11278[11278]:11147[11147]:132[132]|10630[10630]:10487[10487]:144[144]|10339[10345]:10169[10169]:171[165]|9965[9965]:9810[9810]:156[156]|9515[9542]:9345[9345]:171[144]|9037[9043]:8957[8957]:81[75]|8652[8655]:8473[8473]:180[177]|7771[7771]:7610[7610]:162[162]|7280[7280]:7065[7065]:216[216]|6734[6734]:6612[6612]:123[…	GH13_13	GH13+CBM41+CBM48	CBM48+GH13_13	GH	0	0	0	0	0	0	0	6.72721	0	0	0	0	0	0	0	0	0
ERR1719300_1887565|P4_k87_2195159_1_1227|-|571|3.571e-162|1|296|1225|1225[1225]:296[296]:930[930]	GH13_8	GH13+CBM48	CBM48+GH13_8	GH	0	0	0	0	0	0	0	0	0	6.0251	0	0	0	0	0	0	0
MMETSP1084_Transcript_8066_22235269|contig-119_1252|-|1119|0|12|109|4532|4532[4532]:4356[4356]:177[177]|4162[4171]:3995[3995]:168[159]|3721[3721]:3614[3614]:108[108]|3466[3484]:3314[3314]:153[135]|3226[3226]:3131[3131]:96[96]|3008[3014]:2829[2829]:180[174]|2582[2606]:2412[2412]:171[147]|2143[2143]:1892[1892]:252[252]|1541[1541]:1347[1347]:195[195]|1117[1126]:935[935]:183[174]|805[811]:725[725]:81…	GH13_8	GH13+CBM48	CBM48+GH13_8	GH	0	0	0	0	0	0	0	5.96549	0	0	0	0	0	0	0	0	0
ERR1719182_1178717|P4_k87_1126761_1_2725|-|564|4.571e-160|3|1|1222|1222[1222]:1088[1088]:135[135]|1019[1019]:897[897]:123[123]|804[804]:1[1]:804[804]	GH13_8	GH13+CBM48	CBM48+GH13_8	GH	0	0	0	0	0	0	0	0	0	4.67962	0	0	0	0	0	0	0
ERR1719262_906959|contig-119_80755|+|650|5.907e-186|2|192|1128|192[192]:434[434]:243[243]|496[496]:1128[1128]:633[633]	GH13_8	GH13+CBM48	CBM48+GH13_8	GH	0	1.55254	0	0	0	0	1.16969	5.98335	0	0	0.641398	0	0	0	0	0	0
ERR1719443_256139|contig-119_21689|-|1227|0|12|167|3746|3746[3746]:3609[3609]:138[138]|3478[3478]:3242[3242]:237[237]|3108[3108]:2974[2974]:135[135]|2833[2836]:2750[2750]:84[81]|2606[2609]:2430[2430]:177[174]|2261[2261]:2121[2121]:141[141]|1981[1984]:1766[1766]:216[213]|1632[1635]:1495[1495]:138[135]|1352[1355]:1209[1209]:144[141]|1092[1098]:904[904]:189[183]|695[701]:441[441]:255[249]|217[220]:1…	GH13_8	GH13+CBM48	CBM48+GH13_8	GH	0	0	0	0	0	0	0	7.47294	0	0	0	0	0	0	0	0	0
MMETSP1084_Transcript_8066_22235269|F4_k87_588210_1_6606|+|908|1.275e-263|1|171|2699|171[171]:2699[2699]:2529[2529]	GH13_8	GH13+CBM48	GH13_8	GH	0	0	0	0	0.599617	0.257652	0.318948	0.534079	12.628	21.272	3.73653	4.86575	6.5309	4.41456	22.71	2.96724	10.7001
MMETSP0804_Transcript_30026_19099170|contig-119_2694|-|1182|0|10|15947|20203|20203[20203]:20018[20018]:186[186]|19698[19698]:19633[19633]:66[66]|19399[19399]:19223[19223]:177[177]|18993[18996]:18535[18535]:459[456]|18310[18313]:18095[18095]:216[213]|17897[17897]:17742[17742]:156[156]|17589[17592]:17446[17446]:144[141]|17226[17226]:17068[17068]:159[159]|16874[16877]:16452[16452]:423[420]|16198[162…	GH13_11	GH13+GH77+CBM48	CBM48+GH13_11	GH	0	0	0	0	0	0	0	6.59011	0	0	0	0	0	0	0	0	0
X1A147_9512103|contig-119_44749|+|676|8.803e-194|6|0|2468|0[0]:185[185]:186[186]|511[514]:684[684]:174[171]|895[901]:1029[1029]:135[129]|1316[1322]:1519[1519]:204[198]|1794[1803]:2054[2054]:261[252]|2343[2349]:2468[2468]:126[120]	GH13_11	GH13+GH77+CBM48	GH13_11	GH	0	0	0	0	0	0	0.906419	5.65936	0	0	0	0	0	0	0	0	0
MMETSP0325_Transcript_33140_3768614|contig-119_4150|-|769|8.888e-222|1|546|5432|5432[5432]:546[546]:4887[4887]	GH13_25	GH133	GH13_25+GH133	GH	0	0	0	0	0.097114	0	0.313075	0	2.97125	5.178	0.900822	1.55954	4.1455	1.8779	7.43316	2.68695	6.77968
MMETSP0166_Transcript_19464_5795559|P4_k87_1128907_1_1110|-|526|1.256e-148|2|175|1108|1108[1108]:368[368]:741[741]|297[297]:175[175]:123[123]	GH13_25	GH133	N	GH	0	0	0	0	0	0	0	0	0.57712	2.37836	0	0	0	0	0	0	0
ERR1719376_211961|contig-119_38309|+|281|7.103e-75|1|58|1134|58[58]:1134[1134]:1077[1077]	GH13_25	GH133	N	GH	0	0	0	0	0	0	0	0	3.30206	8.2532	0.956321	1.29054	6.44938	4.81279	8.1906	2.50913	2.51676
ERR1719245_2364091|F4_k87_1613024_1_1191|+|282|3.552e-75|1|8|1189|8[8]:1189[1189]:1182[1182]	GH13_25	GH133	N	GH	0	0	0	0	0	0	0	0	5.21742	0	0	0	0	0	0	0	0
MMETSP0325_Transcript_33140_3768614|contig-119_9847|+|592|1.703e-168|1|63|2870|63[63]:2870[2870]:2808[2808]	GH13_25	GH133	GH13_25+GH133	GH	0	0	0	0	0	0	0.284075	0	2.02554	2.21527	0.325258	0.215001	0.412253	0.487323	9.85398	0.93091	4.49596
MMETSP0419_Transcript_14065_20872212|contig-119_5364|-|398|4.275e-110|4|158|1590|1590[1590]:1513[1513]:78[78]|1261[1261]:1109[1109]:153[153]|843[843]:553[553]:291[291]|331[361]:158[158]:174[144]	GH14	GH14	N	GH	0	0	0	0	0	0	0	11.2037	0	0	0	0	0	0	0	0	0
MMETSP1035_Transcript_17992_7171113|contig-119_15951|+|284|8.879e-76|5|87|3498|87[87]:212[212]:126[126]|427[427]:564[564]:138[138]|1975[1981]:2235[2235]:261[255]|2532[2547]:2594[2594]:63[48]|3373[3373]:3498[3498]:126[126]	GH14	GH14	N	GH	0	0	0	0	0	0	0	6.67301	0	0	0	0	0	0	0	0	0
ERR1719221_2295878|contig-119_9461|-|253|1.907e-66|4|62|1564|1564[1564]:1475[1475]:90[90]|948[948]:778[778]:171[171]|565[565]:410[410]:156[156]|184[187]:62[62]:123[120]	GH14	GH14	N	GH	0	0	0	0	0	0	0	7.56607	0	0	0	0	0	0	0	0	0
M1AVY6_6092564|contig-119_23105|+|457|7.416e-128|6|99|2560|99[99]:287[287]:189[189]|526[526]:651[651]:126[126]|921[921]:1019[1019]:99[99]|1352[1352]:1438[1438]:87[87]|1684[1684]:1797[1797]:114[114]|2345[2345]:2560[2560]:216[216]	GH14	GH14	N	GH	0	0	0	0	0	0	0	3.68648	0	0	0	0	0	0	0	0	0
MMETSP0419_Transcript_14070_18721288|contig-119_13371|-|334|7.886e-91|3|5636|6901|6901[6901]:6740[6740]:162[162]|6374[6374]:6117[6117]:258[258]|5866[5881]:5636[5636]:231[216]	GH14	GH14	N	GH	0	0	0	0	0	0	0	7.71626	0	0	0	0	0	0	0	0	0
MMETSP0818_Transcript_16332_5078649|contig-119_1820|-|645|1.89e-184|11|4033|8694|8694[8694]:8515[8515]:180[180]|8420[8423]:8337[8337]:84[81]|8228[8228]:8097[8097]:132[132]|7875[7875]:7705[7705]:171[171]|7490[7493]:7431[7431]:60[57]|7291[7306]:7169[7169]:123[108]|6923[6935]:6753[6753]:171[159]|6539[6539]:6402[6402]:138[138]|5447[5447]:5337[5337]:111[111]|4514[4514]:4365[4365]:150[150]|4122[4131]:4…	GH146	GH146	N	GH	0	0	0	0	0	0	0	6.59736	0	0	0	0	0	0	0	0	0
MMETSP0127_Transcript_17752_33168118|P4_k87_1235491_1_4251|-|337|9.858e-92|1|3576|4250|4250[4250]:3576[3576]:675[675]	GH16	GH16	N	GH	0	0	0	0	0	0	0	0	0	5.39795	0	0	0	0	0	0	0
MMETSP0780_Transcript_39596_21994292|contig-119_71871|+|222|4.095e-57|1|38|478|38[38]:478[478]:441[441]	GH16	GH16	N	GH	0	0	0	0	0	0	11.772	0	0	0	0	0	14.0808	0	0	3.68635	16.1215
A0A0G2I8G0_23673547|contig-119_113336|-|429|1.991e-119|3|0|791|791[791]:732[732]:60[60]|702[723]:151[151]:552[531]|98[98]:0[0]:99[99]	GH16	GH16	GH16	GH	0	0	0	0	0	0	3.34255	5.76071	0	0	0	0	0	0	0	0	0
MMETSP1171_Transcript_6937_5082419|contig-119_11224|-|210|1.677e-53|3|5290|6426|6426[6426]:6229[6229]:198[198]|6020[6020]:5763[5763]:258[258]|5487[5487]:5290[5290]:198[198]	GH16	GH16+CBM32+CBM4+CBM6	N	GH	0	0	0	0	0	0	0	6.30277	0	0	0	0	0	0	0	0	0
ERR1719329_67906|P4_k87_892963_1_3679|-|507|6.587e-143|2|1712|3119|3119[3119]:2919[2919]:201[201]|2725[2725]:1712[1712]:1014[1014]	GH162	GH162	N	GH	0	0	0	9.28179	0	0	0	0	0	5.83699	0	0	0	0	0	0.69078	0
ERR1711939_1015516|contig-119_106020|+|331|6.309e-90|2|20|826|20[20]:619[619]:600[600]|686[686]:826[826]:141[141]	GH17	GH17	GH17	GH	0	0	0	0	0	0	2.99087	4.27923	0	0	0	0	0	0	0	0	0
A0A179FEC7_4029461|contig-119_126522|+|494|5.396e-139|1|156|1187|156[156]:1187[1187]:1032[1032]	GH18	GH18+CBM18	CBM18+GH18	GH	0.541266	0	0	0	0	0	4.67231	7.39828	0	0	0	0	0.625755	0	0	0	0
A0A1B8F515_21943829|contig-119_133045|-|355|3.76e-97|2|7|1003|1003[1003]:323[323]:681[681]|261[261]:7[7]:255[255]	GH2	GH2	GH2	GH	0	0	0	0	0	0	5.33221	6.0479	0	0	0	0.683592	0	0	0	0	0
ERR1719375_2381325|contig-119_7286|-|716|8.006e-206|10|6269|10214|10214[10214]:10083[10083]:132[132]|9954[9954]:9805[9805]:150[150]|9313[9313]:9209[9209]:105[105]|9001[9004]:8846[8846]:156[153]|8742[8760]:8641[8641]:102[84]|8480[8480]:8298[8298]:183[183]|8117[8147]:7926[7926]:192[162]|7618[7618]:7469[7469]:150[150]|6937[6937]:6779[6779]:159[159]|6472[6481]:6269[6269]:204[195]	GH2	GH2	GH2	GH	0	0	0	0	0	0	0	9.03124	0	0	0	0	0.395944	0	0	0	0
MMETSP0233_Transcript_679_6592252|contig-119_38947|+|426|1.593e-118|1|0|1151|0[0]:1151[1151]:1152[1152]	N	GH2	GH2	GH	0.46849	0	0	0	0	0.672513	1.61854	0.45643	0	0	0	0	10.8081	0	1.1285	0.739707	1.5656
A0A1Q7YSJ9_13368975|contig-119_135635|-|300|1.355e-80|1|132|1127|1127[1127]:132[132]:996[996]	N	GH2	GH2	GH	0	0	0	0	0	0	3.91976	9.98471	0	0	0	0.624499	0.656879	0	0	0	0
A0A151BDC3_29893349|contig-119_5222|-|861|1.795e-249|14|338|6554|6554[6554]:6300[6300]:255[255]|6053[6056]:5892[5892]:162[159]|5779[5782]:5627[5627]:153[150]|5518[5530]:5441[5441]:78[66]|4734[4734]:4636[4636]:99[99]|4500[4524]:4273[4273]:228[204]|4147[4156]:3920[3920]:228[219]|3802[3805]:3671[3671]:132[129]|3533[3539]:3393[3393]:141[135]|3316[3337]:2864[2864]:453[432]|1995[1995]:1876[1876]:120[12…	GH2	GH2+CBM32+CBM51+CBM67	GH2	GH	0	0	0	0	0	0	0	5.15616	0	0	0	0	0	0	0	0	0
MMETSP1440_Transcript_30563_35384010|contig-119_15480|-|591|3.405e-168|10|2337|6161|6161[6161]:6078[6078]:84[84]|5861[5861]:5658[5658]:204[204]|5177[5177]:5055[5055]:123[123]|4812[4827]:4678[4678]:135[120]|4387[4399]:4259[4259]:129[117]|3874[3877]:3839[3839]:36[33]|3572[3575]:3444[3444]:129[126]|3249[3249]:3100[3100]:150[150]|2849[2855]:2682[2682]:168[162]|2450[2450]:2337[2337]:114[114]	GH2	GH2+CBM42+CBM67	CBM42+GH2	GH	0.429509	0	0	0	0	0	0	8.77759	0	0	0	0	0	0	0	0	0
MMETSP0034_Transcript_13712_10125308|contig-119_13692|-|405|3.34e-112|5|565|2505|2505[2505]:2404[2404]:102[102]|2061[2061]:1822[1822]:240[240]|1508[1526]:1296[1296]:213[195]|1009[1012]:878[878]:132[129]|624[627]:565[565]:60[57]	GH20	GH20	N	GH	0	0	0	0	0	0	0	9.78955	0	0	0	0	0	0	0	0	0
ERR1711935_652468|P4_k87_194736_1_1834|-|207|1.342e-52|1|46|1626|1626[1626]:46[46]:1581[1581]	GH20	GH20	N	GH	0	0	0	0	0	0	0	0	3.37667	4.50217	0	0	0	0	0.728415	0	0
Q54K56_1645785|F4_k87_1156387_1_1816|-|176|2.881e-43|1|258|1409|1409[1409]:258[258]:1152[1152]	GH20	GH20	N	GH	0	0	0	0	0.52311	0	0	0	10.6761	6.1527	2.17006	1.98737	2.70124	0.806951	5.84422	2.40776	2.41022
MMETSP1103_Transcript_9671_18450499|contig-119_220|-|209|3.354e-53|1|27237|30107|30107[30107]:27237[27237]:2871[2871]	GH20	GH20	N	GH	0	0	0.356856	0	0	0	0	0.463869	7.24762	11.4078	1.8749	2.21064	5.75672	3.15262	22.0304	5.74155	10.9541
MMETSP0359_Transcript_17020_5091061|F8.1_k87_941358_1_1172|-|370|1.148e-101|1|4|1065|1065[1065]:4[4]:1062[1062]	GH20	GH20	N	GH	0	0	0	0	0	0	0	0	5.19677	7.28061	0	2.67707	0	0	3.96917	2.85364	0.914384
MMETSP0359_Transcript_17020_5091061|F4_k87_126633_1_7454|+|492|2.158e-138|1|329|1696|329[329]:1696[1696]:1368[1368]	GH20	GH20	N	GH	0	0	0	0	0	0	0	0	7.27663	8.56089	2.20768	3.11688	4.15665	3.23929	4.14455	0.682564	3.59819
A0A1L9NTN0_30989390|F2.2_k87_1706801_1_1128|-|349|2.407e-95|1|629|1126|1126[1126]:629[629]:498[498]	GH23	GH23	N	GH	0	0	0	0	2.24842	14.2688	0	0	0	0	5.52895	2.19914	0	0	0	5.58818	0
ERR1712159_335321|F8.1_k87_896858_1_6155|-|339|2.464e-92|1|2040|2510|2510[2510]:2040[2040]:471[471]	GH23	GH23	N	GH	0	0	1.71002	0	25.9094	62.4264	0	0	11.3564	3.97943	63.6051	64.2327	0	0	0	0	0
ERR1712159_335321|F8.1_k87_971849_1_1508|+|337|9.858e-92|1|163|633|163[163]:633[633]:471[471]	GH23	GH23	N	GH	0	0	5.13004	0	7.77505	22.9677	0	0	3.78548	10.6118	16.9614	32.9828	0	0	0	0	0
A0A094IYQ3_16258649|contig-119_120434|+|419|2.039e-116|1|1|1008|1[1]:1008[1008]:1008[1008]	GH26	GH26+CBM35	GH26	GH	0	0	0	0	0	0	1.92859	8.18502	0	0	0	0	0	0	1.00969	0	0
G1XYK3_24264473|contig-119_3918|-|481|4.42e-135|7|9235|11540|11540[11540]:11388[11388]:153[153]|11020[11020]:10913[10913]:108[108]|10787[10790]:10638[10638]:150[147]|10393[10393]:10283[10283]:111[111]|10082[10100]:9927[9927]:156[138]|9699[9702]:9595[9595]:105[102]|9351[9354]:9235[9235]:117[114]	GH27	GH27	N	GH	0	0	0	0	0	0	0	6.01319	0	0	0	0	0	0	0	0	0
ERR1719424_1789720|contig-119_1709|+|250|1.525e-65|6|25718|27444|25718[25718]:25780[25780]:63[63]|26097[26097]:26141[26141]:45[45]|26240[26243]:26299[26299]:60[57]|26497[26515]:26724[26724]:228[210]|27000[27006]:27068[27068]:69[63]|27412[27412]:27444[27444]:33[33]	GH27	GH27+CBM35+CBM51	N	GH	0	0	0	0	0	0	0	6.04022	0	0	0	0	0	0	0	0	0
G1XYK3_24264473|P4_k87_1060063_1_1946|+|546|1.198e-154|2|463|1592|463[463]:582[582]:120[120]|636[639]:1592[1592]:957[954]	N	GH27+CBM35+CBM51	GH27	GH	0	0	0	0	0	0	0	0	0	5.47014	0	0.561409	0	0	0	0	0.858711
MMETSP0058_Transcript_30569_38443819|P4_k87_726186_1_5025|-|906|5.102e-263|6|556|3089|3089[3089]:2703[2703]:387[387]|2641[2641]:2348[2348]:294[294]|2324[2342]:1641[1641]:684[666]|1575[1575]:1159[1159]:417[417]|1102[1111]:839[839]:264[255]|765[765]:556[556]:210[210]	GH3	GH3	GH3	GH	0	0	0	0	0	0	0	0	0	2.98779	0	0	0	0	0	0.334584	0
ERR1719469_1153869|contig-119_77985|-|466|1.448e-130|3|15|1115|1115[1115]:942[942]:174[174]|886[886]:698[698]:189[189]|638[638]:15[15]:624[624]	GH3	GH3	N	GH	0	0	0	0	0	0	1.09824	0	0	0	0	0	0.665149	0	0	0.908176	3.12914
A0A1R3JHD8_19044511|contig-119_47189|-|267|1.164e-70|2|2|596|596[596]:249[249]:348[348]|190[193]:2[2]:189[186]	GH3	GH3	N	GH	0	0	0	0	0	0	2.61002	0	0	0	0	0	1.81592	0	0.922437	0	3.91898
Q8NTJ0_36991564|contig-119_82070|+|320|1.292e-86|1|807|1634|807[807]:1634[1634]:828[828]	GH3	GH3	GH3	GH	0	0	0	0	0	0	5.07158	8.66484	0	0	0	0	0	0	0	0	0
A0A0D0AR43_30969659|contig-119_67814|-|515|2.573e-145|1|426|1895|1895[1895]:426[426]:1470[1470]	N	GH3+CBM6	GH3	GH	0	0	0	0	0	0	2.38896	6.70655	0	0	0.316437	0.742166	0	0	0	0	0
MMETSP1405_Transcript_3295_33968015|P4_k87_3227980_1_2034|+|593|8.513e-169|3|251|2007|251[251]:664[664]:414[414]|767[767]:892[892]:126[126]|982[982]:2007[2007]:1026[1026]	GH30_1	GH30	N	GH	0	0	0	0	0	0	0	0	0	3.10607	0	0	0	0	0	0.504767	0
C6D6H6_19994556|contig-119_16428|+|346|1.925e-94|6|641|3476|641[641]:787[787]:147[147]|1184[1184]:1327[1327]:144[144]|2025[2025]:2282[2282]:258[258]|2625[2625]:2750[2750]:126[126]|3056[3056]:3145[3145]:90[90]|3387[3387]:3476[3476]:90[90]	GH30_5	GH30	N	GH	0	0	0	0	0	0	0	6.19797	0	0	0	0	0	0	0	0	0
B0XL49_24071851|contig-119_5153|-|336|1.972e-91|3|12374|13533|13533[13533]:13213[13213]:321[321]|12856[12856]:12668[12668]:189[189]|12454[12454]:12374[12374]:81[81]	GH31	GH31	N	GH	0	0	0	0	0	0	0	5.03013	0	0	0	0	0	0	0	0	0
ERR1719436_1402485|contig-119_116555|-|667|4.507e-191|1|1|1005|1005[1005]:1[1]:1005[1005]	GH31	GH31	GH31	GH	0	0	0	0	0	0	0	0	0	2.66514	0	0	8.35939	0	0	0	0
ERR1719184_668118|P4_k87_486665_1_1182|+|484|5.525e-136|1|0|1013|0[0]:1013[1013]:1014[1014]	GH31	GH31	N	GH	0	0	0	0	0	0	0	0	0	6.87117	0	0	0	0	0	0	0
MMETSP0011_Transcript_38772_29124519|P4_k87_129879_1_1790|-|818|1.579e-236|1|13|1749|1749[1749]:13[13]:1737[1737]	GH31	GH31	GH31	GH	0	0	0	2.9999	0	0	0	0	0.226309	6.02335	0	0	0	0	0	0	0.235361
MMETSP0360_Transcript_32429_26702070|contig-119_106988|-|635|1.936e-181|1|0|1073|1073[1073]:0[0]:1074[1074]	GH31	GH31	GH31	GH	0	0	0	0	0	0	0	2.00317	0	0	0	0	5.92977	0	0	0	0
MMETSP0011_Transcript_38772_29124519|P4_k87_567376_1_2192|+|700|5.247e-201|1|0|1727|0[0]:1727[1727]:1728[1728]	GH31	GH31	GH31	GH	0	0	0	0	0	0	0	0	0	5.59522	0	0	0	0	0	0	0
ERR550532_2639051|contig-119_58493|+|824|2.467e-238|1|11|1399|11[11]:1399[1399]:1389[1389]	GH31	GH31	GH31	GH	0	0	0	0	0	0	0	0	0	0	0	0	3.38062	2.87099	9.82528	5.42176	10.222
ERR1740128_330026|F8.2_k87_1473263_1_1009|-|397|8.55e-110|1|16|1008|1008[1008]:16[16]:993[993]	GH31	GH31	N	GH	0	0	0	0	0.643225	0	0	0	10.5154	14.0522	2.67125	4.14672	2.63291	2.0947	4.3628	0.901036	3.81697
A0A1J9Q507_28236340|F4_k87_1571743_1_1252|+|497|6.745e-140|1|2|1216|2[2]:1216[1216]:1215[1215]	GH31	GH31	N	GH	0	0	0	0	0	0	0	0	6.75513	0.486416	0.404391	0	0	0	0	0	0
ERR1740128_330026|P4_k87_375188_1_1003|+|404|6.68e-112|1|2|1000|2[2]:1000[1000]:999[999]	GH31	GH31	N	GH	0	0	0	0	1.2754	0	0	0	14.5133	11.5069	2.95986	2.72541	0.63998	3.41356	6.68182	0.893692	3.48086
A0A1J9Q507_28236340|contig-119_11121|-|645|1.89e-184|8|3690|7636|7636[7636]:7457[7457]:180[180]|7272[7275]:7135[7135]:138[135]|6814[6814]:6665[6665]:150[150]|5584[5584]:5390[5390]:195[195]|5118[5121]:4987[4987]:132[129]|4700[4709]:4584[4584]:117[108]|4307[4307]:4080[4080]:228[228]|3854[3857]:3690[3690]:165[162]	GH31	GH31	GH31	GH	0	0	0	0	0	0	0	8.31084	0	0	0	0	0	0	0	0	0
A0A0L8H882_14142323|contig-119_15187|-|976|4.321e-284|8|3576|6233|6233[6233]:5763[5763]:471[471]|5627[5627]:5466[5466]:162[162]|5376[5379]:5287[5287]:90[87]|5158[5158]:4961[4961]:198[198]|4869[4872]:4729[4729]:141[138]|4604[4604]:4416[4416]:189[189]|4329[4341]:4135[4135]:195[183]|3995[3995]:3576[3576]:420[420]	GH31	GH31	GH31	GH	0	0	0	0	0	0	0	4.33376	0	0	0	0	0.301719	0	0	0	0
N6UEN5_22572071|contig-119_9010|+|1032|5.997e-301|2|957|3778|957[957]:1949[1949]:993[993]|2033[2033]:3778[3778]:1746[1746]	GH31	GH31	GH31	GH	0	0.383739	0.125373	0	0.182659	0.941989	0	0.325751	4.9767	4.90902	1.92857	2.84893	3.58828	3.66461	12.126	3.71934	5.89716
A0A0C2GHC5_38758969|contig-119_7521|+|655|1.846e-187|8|3350|7495|3350[3350]:3496[3496]:147[147]|3907[3907]:4116[4116]:210[210]|4414[4420]:4614[4614]:201[195]|5024[5024]:5239[5239]:216[216]|5677[5677]:5814[5814]:138[138]|6022[6025]:6438[6438]:417[414]|6738[6738]:7013[7013]:276[276]|7262[7262]:7495[7495]:234[234]	GH31	GH31	GH31	GH	0.266237	0	0	0	0	0	0	7.22039	0	0	0	0	0	0	0	0	0
A0A0L8H882_14142323|F4_k87_1472433_1_9272|+|1228|0|2|4840|7810|4840[4840]:4980[4980]:141[141]|5048[5048]:7810[7810]:2763[2763]	GH31	GH31	GH31	GH	0	0	0	0	0.171119	0	0	0.152667	15.6113	17.1441	3.41614	3.66478	3.1013	2.88402	10.6295	2.06185	4.1126
A0A1J9Q507_28236340|P4_k87_1690077_1_1443|+|591|3.405e-168|1|15|1436|15[15]:1436[1436]:1422[1422]	GH31	GH31	GH31	GH	0	0	0	0	0	0	0	0	0	5.94603	0	0	0	0	0	0	0
MMETSP0039_Transcript_26197_10784962|P4_k87_33888_1_1039|-|436|1.555e-121|3|31|1035|1035[1035]:730[730]:306[306]|654[654]:259[259]:396[396]|180[180]:31[31]:150[150]	GH31	GH31	N	GH	0	0	0	0	0	0	0	0	0	2.02558	0	0	0	0	0	1.11616	0
A0A1J9Q507_28236340|contig-119_4404|-|649|1.181e-185|9|5300|9185|9185[9185]:9099[9099]:87[87]|8881[8893]:8663[8663]:219[207]|8065[8065]:7925[7925]:141[141]|7746[7749]:7669[7669]:78[75]|7491[7491]:7405[7405]:87[87]|7076[7076]:6867[6867]:210[210]|6583[6589]:6329[6329]:255[249]|6070[6073]:5759[5759]:312[309]|5413[5413]:5300[5300]:114[114]	GH31	GH31	GH31	GH	0	0	0	0	0	0	0	5.99091	0	0	0	0	0	0	0	0	0
MMETSP0942_Transcript_2561_38593564|contig-119_15877|-|298|5.419e-80|6|10|2868|2868[2868]:2764[2764]:105[105]|2507[2507]:2421[2421]:87[87]|2202[2211]:1972[1972]:231[222]|1414[1438]:1292[1292]:123[99]|598[598]:500[500]:99[99]|69[87]:10[10]:60[42]	GH35	GH35	N	GH	0	0	0	0	0	0	0	2.10092	0	0	0	0	0	0	0	0	0
MMETSP1370_Transcript_3423_7171692|contig-119_5531|+|278|5.683e-74|4|7290|8320|7290[7290]:7340[7340]:51[51]|7462[7462]:7542[7542]:81[81]|7806[7809]:7982[7982]:177[174]|8201[8201]:8320[8320]:120[120]	GH35	GH35	N	GH	0	0	0	0	0	0	0	7.79334	0	0	0	0	0	0	0	0	0
MMETSP0382_Transcript_79000_10172314|contig-119_32015|-|322|3.23e-87|6|1081|2785|2785[2785]:2702[2702]:84[84]|2608[2608]:2177[2177]:432[432]|2063[2072]:1893[1893]:171[162]|1701[1704]:1603[1603]:99[96]|1471[1471]:1316[1316]:156[156]|1161[1161]:1081[1081]:81[81]	GH35	GH35+CBM32	N	GH	0	0	0	0	0	0	0.960464	4.89109	0	0	0	0	0	0	0	0	0
MMETSP0272_Transcript_130806_7265938|contig-119_3972|-|428|3.982e-119|8|9690|11934|11934[11934]:11872[11872]:63[63]|11794[11794]:11711[11711]:84[84]|11536[11545]:11354[11354]:183[174]|11075[11075]:10956[10956]:120[120]|10798[10804]:10685[10685]:114[108]|10371[10371]:10273[10273]:99[99]|10140[10140]:9985[9985]:156[156]|9767[9770]:9690[9690]:78[75]	GH35	GH35+CBM32	N	GH	0	0	0	0	0	0	0	5.29227	0	0	0	0	0	0	0	0	0
MMETSP0807_Transcript_920_9438079|contig-119_2364|-|777|3.472e-224|11|8481|14294|14294[14294]:14109[14109]:186[186]|13783[13783]:13646[13646]:138[138]|13398[13401]:13288[13288]:111[108]|13054[13066]:12923[12923]:132[120]|11487[11487]:11353[11353]:135[135]|11146[11167]:11018[11018]:129[108]|10799[10802]:10611[10611]:189[186]|10331[10334]:10143[10143]:189[186]|9846[9849]:9673[9673]:174[171]|9130[91…	N	GH36	GH36	GH	0	0	0	0	0	0	0	8.31408	0	0	0	0	0	0	0	0	0
MMETSP1464_Transcript_23350_27819526|contig-119_3542|+|870|3.506e-252|12|3669|11961|3669[3669]:3863[3863]:195[195]|4198[4198]:4341[4341]:144[144]|4796[4799]:4939[4939]:144[141]|7880[7880]:8005[8005]:126[126]|8342[8345]:8443[8443]:102[99]|8738[8738]:8872[8872]:135[135]|9272[9272]:9403[9403]:132[132]|9808[9817]:9993[9993]:186[177]|10216[10222]:10338[10338]:123[117]|10637[10640]:10876[10876]:240[237…	N	GH36	GH36	GH	0	0	0	0	0	0	0	6.7727	0	0	0	0	0	0	0	0	0
M0UJ74_4292005|contig-119_27932|-|213|2.097e-54|1|1599|2519|2519[2519]:1599[1599]:921[921]	GH37	GH37	N	GH	0	0	0	0	0	0	0	0	7.94304	8.81715	1.63418	2.63212	0	1.29042	10.1276	3.79996	5.82837
C3YEI8_9135292|contig-119_2391|+|443|1.215e-123|1|2603|4261|2603[2603]:4261[4261]:1659[1659]	GH37	GH37	N	GH	0	0	0	0	0	0	0	0.579303	11.4493	12.3843	4.16821	3.9097	6.1711	4.77539	14.4554	1.03513	5.71903
C3YEI8_9135292|P4_k87_2930577_1_1823|-|391|5.472e-108|1|17|937|937[937]:17[17]:921[921]	GH37	GH37	N	GH	0	0	0	0	0	0	0	0	0	7.91143	0	0	0	0	0	0	0
MMETSP0361_Transcript_165406_20865771|contig-119_64340|-|298|5.419e-80|1|24|749|749[749]:24[24]:726[726]	GH37	GH37	N	GH	0	0	0	0	0	0	3.08637	0	0	0	0	0	6.28608	0.777949	1.08197	4.2588	6.054
ERR550534_194798|contig-119_15206|+|853|4.595e-247|3|2|2907|2[2]:502[502]:501[501]|580[580]:741[741]:162[162]|811[814]:2907[2907]:2097[2094]	GH38	GH38	GH38	GH	0	0	0	0	0	0	0	0.485087	1.09879	2.14455	0.191003	0.891419	2.36204	2.48674	10.8625	1.91675	6.97287
ERR550534_194798|contig-119_3089|-|852|9.19e-247|14|10922|17592|17592[17592]:17503[17503]:90[90]|17409[17424]:17311[17311]:99[84]|17144[17147]:17043[17043]:102[99]|16925[16925]:16719[16719]:207[207]|16332[16332]:16132[16132]:201[201]|15912[15912]:15736[15736]:177[177]|15509[15512]:15432[15432]:78[75]|15167[15167]:15054[15054]:114[114]|14351[14351]:14190[14190]:162[162]|12976[12976]:12794[12794]:1…	GH38	GH38	GH38	GH	0	0	0	0	0	0	0	3.20745	0	0	0	0	0	0	0	0	0
A0A0L8QUN7_12087672|P4_k87_303185_1_1037|-|544|4.793e-154|1|26|1036|1036[1036]:26[26]:1011[1011]	GH38	GH38	GH38	GH	0	0	0	0	0	0	0	0	0	5.0185	0	0	0	0	0	0	0
ERR550534_194798|F4_k87_389708_1_4238|-|998|1.03e-290|3|822|4075|4075[4075]:3227[3227]:849[849]|3149[3149]:2988[2988]:162[162]|2918[2921]:822[822]:2097[2094]	GH38	GH38	GH38	GH	0	0	0	0	0.158821	0.409609	0	0	10.7688	13.7547	2.69012	1.93373	1.47832	1.11744	4.82545	1.2472	0.977062
ERR1712137_329984|P4_k87_1903944_1_2787|-|739|9.544e-213|1|1|2145|2145[2145]:1[1]:2145[2145]	GH38	GH38	N	GH	0	0	0	0	0	0	0	0	0	5.04697	0	0	0	0	0	0	0
ERR1719259_146520|contig-119_82697|-|422|2.548e-117|2|2|1062|1062[1062]:202[202]:861[861]|124[124]:2[2]:123[123]	GH38	GH38	N	GH	0	0	0	0	0	0	0	0	7.06527	7.5437	4.5276	2.15122	3.12114	3.35689	21.0806	3.77928	4.91987
MMETSP0740_Transcript_27976_28243314|F2.1_k87_2315147_1_5672|+|271|7.274e-72|1|5218|5598|5218[5218]:5598[5598]:381[381]	GH43_11	GH43	N	GH	0	0	12.3859	0	19.477	72.4251	0	0	10.6231	9.96058	78.7763	114.494	0	0	0	0	0
MMETSP0107_Transcript_18658_18416922|contig-119_6365|-|670|5.634e-192|7|1679|4698|4698[4698]:4471[4471]:228[228]|4303[4303]:4214[4214]:90[90]|3845[3869]:3576[3576]:270[246]|3271[3271]:3035[3035]:237[237]|2742[2760]:2554[2554]:189[171]|2294[2297]:2103[2103]:192[189]|1849[1849]:1679[1679]:171[171]	GH47	GH47	GH47	GH	0	0	0	0	0	0	0	9.15037	0	0	0	0	0	0	0.234677	0	0
MMETSP0107_Transcript_33066_21123076|contig-119_47641|-|305|4.234e-82|1|868|1878|1878[1878]:868[868]:1011[1011]	GH47	GH47	N	GH	0	0	0	0	0	0	0	0	6.38238	8.86702	2.49383	0.708073	8.45261	3.80569	14.2339	3.05552	9.90536
MMETSP1166_Transcript_32559_21370163|P4_k87_797971_1_3232|-|580|6.974e-165|1|2101|3228|3228[3228]:2101[2101]:1128[1128]	GH47	GH47	N	GH	0	0	0	0	0	0	0	0	5.48918	4.41887	0	0	2.44322	0.826015	3.95801	0.896447	0.520756
MMETSP0107_Transcript_33066_21123076|P4_k87_1862495_1_2165|-|357|9.401e-98|1|992|2164|2164[2164]:992[992]:1173[1173]	GH47	GH47	N	GH	0	0	0	0	0	0	0	0	9.94634	9.50881	0	2.40924	0	0.419736	0	0	0
G9MLB4_32144690|contig-119_48550|-|582|1.744e-165|3|1044|2469|2469[2469]:2221[2221]:249[249]|2128[2128]:1358[1358]:771[771]|1304[1307]:1044[1044]:261[258]	GH47	GH47	GH47	GH	0	0	0	0	0	0	2.12841	4.79152	0	0	0	0	0	0	0	0	0
MMETSP1166_Transcript_32559_21370163|contig-119_83649|-|464|5.794e-130|2|2|1044|1044[1044]:328[328]:717[717]|274[298]:2[2]:273[249]	GH47	GH47	N	GH	0	0	0	0	0	0	2.71371	0	0	0	0	0	0	0.510567	0	0	4.11511
A0A1S2YRM9_39163178|contig-119_19309|+|757|3.641e-218|9|1260|4578|1260[1260]:1349[1349]:90[90]|1503[1506]:1649[1649]:147[144]|1850[1853]:2041[2041]:192[189]|2384[2384]:2509[2509]:126[126]|2628[2637]:2822[2822]:195[186]|3179[3191]:3337[3337]:159[147]|3630[3633]:3818[3818]:189[186]|4095[4095]:4283[4283]:189[189]|4531[4531]:4578[4578]:48[48]	GH47	GH47	GH47	GH	0	0	0	0	0	0	0	7.38838	0	0	0	0	0	0	0	0	0
MMETSP0965_Transcript_15143_30212596|F4_k87_70207_1_3728|+|478|3.536e-134|1|464|1771|464[464]:1771[1771]:1308[1308]	GH47	GH47	N	GH	0	0	0	0	0.442109	0	0	0	13.972	14.845	1.77202	1.6385	4.38282	0.727459	18.5699	3.47377	9.88571
MMETSP0107_Transcript_33066_21123076|contig-119_22083|-|301|6.774e-81|1|2093|2860|2860[2860]:2093[2093]:768[768]	GH47	GH47	N	GH	0	0	0	0	0	0	0	0	0	0.761973	0	0	1.70955	0	7.32545	0	2.20978
MMETSP1103_Transcript_9091_38079650|F4_k87_1638333_1_16376|-|854|2.298e-247|1|6709|8982|8982[8982]:6709[6709]:2274[2274]	GH47	GH47	GH47	GH	0	0	0	0	0	0.290882	0	0.602088	12.3388	14.9714	3.52401	3.28101	4.30365	2.14413	12.613	2.55768	4.74883
MMETSP1103_Transcript_9091_38079650|contig-119_7267|-|765|1.422e-220|1|5945|7345|7345[7345]:5945[5945]:1401[1401]	GH47	GH47	GH47	GH	0	0	0	0	0.404747	0	0	0	2.34443	2.91934	0.321098	2.00049	5.6788	4.45223	14.2142	1.73464	6.77241
MMETSP0107_Transcript_18658_18416922|F4_k87_216204_1_5134|+|552|1.872e-156|1|2260|4026|2260[2260]:4026[4026]:1767[1767]	GH47	GH47	N	GH	0	0	0	0	0	0	0	0	7.07194	4.80287	0.693504	0	2.736	0	11.2458	3.05385	1.82923
MMETSP0269_Transcript_100406_14151926|contig-119_1234|-|529|1.57e-149|8|11810|14860|14860[14860]:14699[14699]:162[162]|14446[14446]:14264[14264]:183[183]|14021[14036]:13839[13839]:183[168]|13568[13568]:13446[13446]:123[123]|13197[13197]:13111[13111]:87[87]|12874[12880]:12692[12692]:183[177]|12444[12450]:12241[12241]:204[198]|11977[11977]:11810[11810]:168[168]	GH47	GH47	N	GH	0	0	0	0	0	0	0	8.89044	0	0	0	0	0	0	0	0	0
MMETSP0107_Transcript_33066_21123076|contig-119_50961|+|399|2.138e-110|1|8|802|8[8]:802[802]:795[795]	GH47	GH47	N	GH	0	0	0	0	0	0	0	0	0	0	0	0	0	2.76572	0	0	0
MMETSP0817_Transcript_6944_35530294|contig-119_1339|-|793|5.298e-229|12|22669|26688|26688[26688]:26599[26599]:90[90]|26445[26463]:26356[26356]:90[72]|26114[26117]:26001[26001]:114[111]|25691[25694]:25533[25533]:159[156]|25208[25208]:25056[25056]:153[153]|24846[24861]:24724[24724]:123[108]|24550[24550]:24470[24470]:81[81]|24272[24272]:24159[24159]:114[114]|23944[23947]:23828[23828]:117[114]|23670[…	GH47	GH47	N	GH	0	0	0	0	0	0	0	4.99243	0	0	0	0	0	0	0	0	0
MMETSP0107_Transcript_18658_18416922|contig-119_1460|+|306|2.117e-82|1|9944|12868|9944[9944]:12868[12868]:2925[2925]	GH47	GH47	N	GH	0	0	0	0	0.509142	0	0.271621	0.908751	10.732	16.0305	2.54145	1.65247	8.24438	4.33894	21.3049	3.95392	11.4455
ERR1719410_1856032|contig-119_3247|-|491|4.317e-138|6|139|2944|2944[2944]:2684[2684]:261[261]|2123[2123]:1992[1992]:132[132]|1612[1612]:1400[1400]:213[213]|1175[1175]:1035[1035]:141[141]|823[826]:593[593]:231[228]|315[327]:139[139]:177[165]	GH47	GH47	N	GH	0	1.08447	0	0	0	0	0	3.70189	0	0	0	0	0	0	0	0	0
MMETSP1166_Transcript_32559_21370163|contig-119_18531|-|424|6.37e-118|6|44|2041|2041[2041]:1823[1823]:219[219]|1609[1612]:1511[1511]:99[96]|1331[1331]:1173[1173]:159[159]|1008[1017]:922[922]:87[78]|675[675]:445[445]:231[231]|211[211]:44[44]:168[168]	GH47	GH47	N	GH	0	0	0	0	0	0	0	8.8716	0	0	0	0	0	0	0	0	0
I0YXB6_11382649|contig-119_6430|-|227|1.28e-58|5|4790|7622|7622[7622]:7488[7488]:135[135]|6795[6795]:6553[6553]:243[243]|5989[5989]:5774[5774]:216[216]|5405[5405]:5295[5295]:111[111]|4924[4924]:4790[4790]:135[135]	GH5	GH5	N	GH	0	0	0	0	0	0	0	9.1888	0	0	0	0	0	0	0	0	0
MMETSP0199_Transcript_6454_16041242|P4_k87_61432_1_1846|+|332|3.154e-90|1|1066|1809|1066[1066]:1809[1809]:744[744]	GH5_12	GH5	N	GH	0	0	0	0	0	0	0	0	1.46678	5.55665	0	0	0	0	0	1.36653	0
I0YXB6_11382649|contig-119_2155|-|166|2.951e-40|4|6248|9136|9136[9136]:8924[8924]:213[213]|8253[8253]:8002[8002]:252[252]|7280[7280]:7083[7083]:198[198]|6397[6397]:6248[6248]:150[150]	GH5	GH5+CBM2+CBM3	N	GH	0	0	0	0	0	0	0	2.96827	0	0	0	0	0	0	0	0	0
ERR1719412_2692281|contig-119_20060|+|558|2.925e-158|7|1853|4774|1853[1853]:2023[2023]:171[171]|2170[2173]:2268[2268]:99[96]|2440[2443]:2556[2556]:117[114]|2827[2827]:2967[2967]:141[141]|3155[3158]:3259[3259]:105[102]|3963[3963]:4208[4208]:246[246]|4574[4580]:4774[4774]:201[195]	N	GH63	GH63	GH	0	0	0	0	0	0	0	2.53236	0	0	0	0	0	0	0	0	0
MMETSP0272_Transcript_7130_25417875|P4_k87_802677_1_2390|-|554|4.68e-157|2|29|1520|1520[1520]:1212[1212]:309[309]|1129[1129]:29[29]:1101[1101]	N	GH63	GH63	GH	0	0	0	0	0	0	0	0	0	3.60398	0	0	0	0	0	0	0
MMETSP0405_Transcript_16042_14418211|F8.2_k87_607164_1_1249|-|352|3.008e-96|1|47|1246|1246[1246]:47[47]:1200[1200]	GH65	GH65	N	GH	0	0	0	0	0.492416	0	0	0.430369	5.84075	11.3363	3.24841	4.82522	0.557125	2.42101	7.44265	0.686747	3.15469
MMETSP0405_Transcript_16042_14418211|F4_k87_303480_1_2846|-|428|3.982e-119|1|293|2362|2362[2362]:293[293]:2070[2070]	GH65	GH65	N	GH	0	0	0	0	0.75657	0.324347	0	0.671654	11.2098	14.3852	3.78831	2.69734	6.0809	4.28651	18.1493	3.64799	9.46231
A8DVC0_32090998|contig-115_17515|-|531|3.926e-150|2|18|1594|1594[1594]:833[833]:762[762]|626[626]:18[18]:609[609]	GH73	GH73+CBM50	N	GH	10.1569	48.9117	7.39879	13.9609	0	0	0	0.36552	0	0.207558	0	0	0	0	0	0	0
A0A0R2TWD2_24653432|contig-119_3395|-|560|7.313e-159|8|53|2801|2801[2801]:2652[2652]:150[150]|2397[2397]:2293[2293]:105[105]|2112[2112]:1918[1918]:195[195]|1484[1484]:1383[1383]:102[102]|1196[1202]:1107[1107]:90[84]|935[935]:762[762]:174[174]|534[537]:367[367]:168[165]|166[193]:53[53]:114[87]	GH77	GH77	GH77	GH	0	0	0	0	0	0	0	4.57555	0	0	0	0	0	0	0	0	0
A0A1V5H1M8_19390664|contig-119_30035|-|502|2.108e-141|7|153|2910|2910[2910]:2761[2761]:150[150]|2637[2640]:2449[2449]:189[186]|2300[2312]:2133[2133]:168[156]|1297[1297]:1157[1157]:141[141]|946[949]:782[782]:165[162]|576[576]:457[457]:120[120]|314[329]:153[153]:162[147]	GH77	GH77+CBM20	CBM20+GH77	GH	0	0	0	0	0	0	0.899669	9.65949	0	0	0	0	0	0	0	0	0
M1WIS2_7998446|contig-119_80533|+|527|6.282e-149|3|1|1067|1[1]:624[624]:624[624]|686[686]:754[754]:69[69]|807[813]:1067[1067]:261[255]	GH81	GH81+CBM6	GH81	GH	0	0	0	0	0	0	2.09588	5.34656	0	0	0	0	0	0	0	0	0
A0A0K2U0E1_30655326|contig-119_27204|+|154|1.209e-36|1|49|585|49[49]:585[585]:537[537]	GH85	GH85	N	GH	0	0	0	0	0	0	0	0	0	6.27883	0	0	9.32144	3.49637	6.52244	2.39091	0
A0A0K2U0E1_30655326|P4_k87_864310_1_2733|+|216|2.621e-55|1|168|1139|168[168]:1139[1139]:972[972]	GH85	GH85	N	GH	0	0	0.451948	0	1.99002	0.851797	0	1.14742	19.3702	22.061	4.40079	2.58746	5.98422	6.25643	19.7502	1.85715	10.8175
A0A087SUU1_16058275|contig-119_7753|+|399|2.138e-110|6|3506|5333|3506[3506]:3700[3700]:195[195]|3787[3790]:3987[3987]:201[198]|4116[4137]:4343[4343]:228[207]|4444[4444]:4545[4545]:102[102]|4705[4705]:4881[4881]:177[177]|5133[5133]:5333[5333]:201[201]	GH85	GH85	N	GH	0	0	0	0	0	0	0	5.46784	0	0	0	0	0	0	0	0	0
S7RUX9_29490601|contig-119_91852|-|445|3.038e-124|1|0|1292|1292[1292]:0[0]:1293[1293]	GH88	GH88	GH88	GH	0.404573	0.923167	0	0	0	0	2.09762	6.68831	0	0	0	0.437355	0	0	0	0	0.337474
A0A1Q6I9G5_4446906|contig-119_2065|-|595|2.128e-169|7|6428|8625|8625[8625]:8509[8509]:117[117]|8398[8413]:8225[8225]:174[159]|8063[8063]:7842[7842]:222[222]|7672[7681]:7541[7541]:132[123]|7418[7421]:7320[7320]:99[96]|7193[7202]:6873[6873]:321[312]|6589[6592]:6428[6428]:162[159]	GH89	GH89	GH89	GH	0	0	0	0	0	0	0	7.01604	0	0	0	0	0	0	0	0	0
ERR1719259_49374|contig-119_8763|-|511|4.117e-144|8|1067|5432|5432[5432]:5271[5271]:162[162]|5038[5038]:4964[4964]:75[75]|4753[4756]:4643[4643]:111[108]|4113[4125]:3898[3898]:216[204]|3408[3408]:3283[3283]:126[126]|2243[2243]:2166[2166]:78[78]|1757[1757]:1491[1491]:267[267]|1156[1162]:1067[1067]:90[84]	GH9	GH9+CBM2+CBM3	GH9	GH	0	0	0	0	0	0	0	3.86197	0	0	0	0	0	0	0	0	0
I0YSD3_39578513|contig-119_1229|+|1332|0|12|17626|21821|17626[17626]:17691[17691]:66[66]|17877[17892]:18116[18116]:240[225]|18356[18359]:18535[18535]:180[177]|18706[18727]:18834[18834]:129[108]|18962[18962]:19084[19084]:123[123]|19338[19353]:19568[19568]:231[216]|19840[19840]:19989[19989]:150[150]|20241[20247]:20408[20408]:168[162]|20616[20619]:20750[20750]:135[132]|20966[20966]:21100[21100]:135[…	GH9	GH9+CBM3	GH9	GH	0	0	0	0	0	0	0	5.26435	0	0	0	0	0	0	0	0	0
MMETSP1333_Transcript_3804_15656960|P4_k87_3083428_1_1127|-|350|1.203e-95|3|276|1093|1093[1093]:806[806]:288[288]|732[732]:553[553]:180[180]|482[482]:276[276]:207[207]	GH99	GH99	N	GH	0	0	0	0	0	0	0	0	0	1.79932	0	0	0	0	0	0	0.851955
ERR1719223_749229|F4_k87_1257196_1_5566|-|554|4.68e-157|3|1999|3453|3453[3453]:3391[3391]:63[63]|3308[3308]:3189[3189]:120[120]|3120[3120]:1999[1999]:1122[1122]	GH13_1	N	GH13_1	GH	0	0	0	0	1.33029	0	0	0	12.2278	14.5417	4.78744	3.88911	1.9689	2.06498	11.8005	5.25031	5.86776
MMETSP0804_Transcript_12739_26189069|contig-119_4622|-|692|1.343e-198|9|10605|13989|13989[13989]:13918[13918]:72[72]|13764[13764]:13708[13708]:57[57]|13534[13537]:13364[13364]:171[168]|13031[13031]:12939[12939]:93[93]|12640[12643]:12446[12446]:195[192]|12117[12117]:11998[11998]:120[120]|11707[11713]:11585[11585]:123[117]|11273[11276]:11037[11037]:237[234]|10712[10712]:10605[10605]:108[108]	GH13_6	N	GH13_6	GH	0	0	0	0	0	0	0	3.6145	0	0	0	0	0	0	0	0	0
A0A0F8CXE6_15684153|contig-119_762|-|659|1.154e-188|1|2303|4318|4318[4318]:2303[2303]:2016[2016]	GH2	N	GH2	GH	0.238044	0	0	0	0.519286	0	0	0.230377	3.26259	3.12008	0.5678	2.13544	4.96063	5.39603	20.6294	5.42022	11.516
A0A0E9LYY1_27476078|P4_k87_834925_1_3723|-|717|4.003e-206|3|203|2841|2841[2841]:2455[2455]:387[387]|2372[2378]:2190[2190]:183[177]|2113[2113]:203[203]:1911[1911]	GH2	N	GH2	GH	0	0	0	1.00002	0	0	0	0	0.149491	4.4826	0	0	0	0	0.113483	0.297382	0
A0A100IP00_39000464|contig-119_135019|-|426|1.593e-118|4|2|976|976[976]:785[785]:192[192]|736[742]:551[551]:186[180]|500[500]:321[321]:180[180]|250[250]:2[2]:249[249]	GH28	N	GH28	GH	0	0	0	0	0	0	5.32297	1.51777	0	0	0	0	0	0	0.465749	0	0
A0A1J9Q507_28236340|contig-119_5034|+|674|3.521e-193|12|3433|8154|3433[3433]:3519[3519]:87[87]|3774[3783]:3905[3905]:132[123]|4025[4034]:4186[4186]:162[153]|4392[4398]:4535[4535]:144[138]|4875[4878]:4952[4952]:78[75]|5211[5211]:5306[5306]:96[96]|5941[5941]:6093[6093]:153[153]|6436[6439]:6582[6582]:147[144]|6779[6782]:6889[6889]:111[108]|7237[7240]:7419[7419]:183[180]|7627[7630]:7764[7764]:138[135…	GH31	N	GH31	GH	0	0	0	0	0	0	0	2.9587	0	0	0	0	0	0	0	0	0
R8BJ00_25667706|contig-119_8102|-|403|1.336e-111|4|7914|9786|9786[9786]:9637[9637]:150[150]|9246[9246]:9085[9085]:162[162]|8714[8726]:8478[8478]:237[225]|8195[8204]:7914[7914]:282[273]	GT2_Glyco_trans_2_3	GT0	N	GT	0	0	0	0	0	0	0	8.95442	0	0	0	0	0	0	0	0	0
MMETSP0058_Transcript_12967_5913232|contig-119_4557|-|584|4.359e-166|6|8519|10777|10777[10777]:10667[10667]:111[111]|10463[10463]:10260[10260]:204[204]|9962[9980]:9756[9756]:207[189]|9518[9533]:9324[9324]:195[180]|9037[9037]:8900[8900]:138[138]|8659[8659]:8519[8519]:141[141]	N	GT0	GT0	GT	0	0	0	0	0	0	0	8.71765	0	0	0	0	0	0	0	0	0
A0A099L4F5_15490468|contig-119_7213|+|639|1.21e-182|2|6606|8712|6606[6606]:7697[7697]:1092[1092]|7741[7741]:8712[8712]:972[972]	N	GT0	GT0	GT	3.7074	7.91503	0.692701	0	1.76803	11.7161	10.8268	8.2957	1.84337	3.14262	7.14092	0.245991	25.7387	8.93145	1.25426	5.11321	7.50633
A0A099L4F5_15490468|F0_k87_6839663_1_6756|+|651|2.954e-186|2|3441|5675|3441[3441]:4547[4547]:1107[1107]|4620[4620]:5675[5675]:1056[1056]	N	GT0	GT0	GT	0.219661	0	11.9723	0	0.23915	0.308183	0	0	0.872687	0.119001	54.2944	8.61751	0	0	0	0	0
ERR1712032_825494|P4_k87_1823910_1_7196|-|504|5.27e-142|1|6522|7193|7193[7193]:6522[6522]:672[672]	GT1	GT1	N	GT	0	0	0	0	0	0	0	0	0	6.04697	0.990861	0	0	0	0	0	0
MMETSP0472_Transcript_46820_2643368|P4_k87_1819324_1_2136|+|574|4.463e-163|1|956|2134|956[956]:2134[2134]:1179[1179]	GT1	GT1	N	GT	0	0	0	0	0	0	0	0	0	4.30517	0	0	0	0	0	0	0
MMETSP0472_Transcript_46820_2643368|P4_k87_351547_1_1778|+|930|3.041e-270|1|256|1776|256[256]:1776[1776]:1521[1521]	GT1	GT1	N	GT	0	0	0	0	0	0	0	0	0	5.45755	0.303245	0	0	0	0.199455	0	0
MMETSP1104_Transcript_12974_24461892|contig-119_19026|+|237|1.25e-61|1|158|1849|158[158]:1849[1849]:1692[1692]	GT1	GT1	N	GT	0	0	0.219244	0	0	0	0.50489	0	10.7847	6.79379	1.88379	2.04891	3.13113	3.52871	16.8743	6.48063	9.09119
A0A1L6YEA0_8536417|F2.2_k87_2495782_1_12097|+|534|4.908e-151|2|82|1958|82[82]:1209[1209]:1128[1128]|1233[1233]:1958[1958]:726[726]	GT1	GT1	GT1	GT	0	0	1.77613	4.1694	10.9364	36.447	0	0	5.85931	4.71156	42.9208	64.4698	0	0	0	0	0
ERR1711977_792649|contig-119_1633|-|245|4.881e-64|3|17034|18329|18329[18329]:18165[18165]:165[165]|17642[17642]:17520[17520]:123[123]|17222[17228]:17034[17034]:189[183]	GT1	GT1	N	GT	0	0	0	0	0	0	0	8.05363	0	0	0	0	0	0	0	0	0
A0A1B9I9L5_31844090|contig-119_16431|-|431|4.977e-120|6|2511|4750|4750[4750]:4700[4700]:51[51]|4574[4577]:4419[4419]:156[153]|4093[4093]:3959[3959]:135[135]|3423[3423]:3130[3130]:294[294]|2991[2991]:2815[2815]:177[177]|2705[2708]:2511[2511]:195[192]	GT1	GT1	N	GT	0	0	0	0	0	0	0	4.95135	0	0	0	0	0	0	0	0	0
ERR1712063_223304|P4_k87_607049_1_1703|-|775|1.389e-223|3|261|1422|1422[1422]:1267[1267]:156[156]|1208[1211]:954[954]:255[252]|890[890]:261[261]:630[630]	GT1	GT1	N	GT	0	0	0	0	0	0	0	0	0	3.32283	0	0	0	0	0	0	0
A0A075ARK6_370109|contig-119_8108|+|512|2.058e-144|4|128|2058|128[128]:463[463]:336[336]|698[701]:922[922]:225[222]|1115[1118]:1414[1414]:300[297]|1630[1630]:2058[2058]:429[429]	GT10	GT10	N	GT	0	0	0	0	0	0	0	7.14469	0	0	0	0	0.469904	0	0	0	0
A0A1D2A5X8_13490270|contig-119_5468|+|332|3.154e-90|5|5997|8917|5997[5997]:6158[6158]:162[162]|6770[6770]:6931[6931]:162[162]|7219[7237]:7359[7359]:141[123]|8182[8182]:8391[8391]:210[210]|8723[8723]:8917[8917]:195[195]	GT13	GT13	N	GT	0	0	0	0	0	0	0	8.30666	0	0	0	0	0	0	0	0	0
ERR1712137_493431|P4_k87_2205667_1_2215|-|728|1.955e-209|3|695|2165|2165[2165]:1059[1059]:1107[1107]|978[978]:811[811]:168[168]|757[763]:695[695]:63[57]	GT13	GT13	N	GT	0	0	0	2.06702	0	0	0	0	0	2.36999	0	0	0	0	0	0	0.650172
MMETSP0942_Transcript_3343_12140197|F4_k87_1109301_1_11898|+|399|2.138e-110|2|10248|11545|10248[10248]:10895[10895]:648[648]|10964[10973]:11545[11545]:582[573]	GT13	GT13	N	GT	0	0	0	0	0.483896	0	0	0.423263	11.6561	16.9128	2.41058	2.8297	7.02189	5.61279	18.3346	3.43228	6.53413
ERR1712093_854153|contig-119_5364|+|476|1.415e-133|7|7646|9984|7646[7646]:7816[7816]:171[171]|8132[8132]:8302[8302]:171[171]|8530[8533]:8652[8652]:123[120]|8829[8835]:8909[8909]:81[75]|9090[9090]:9257[9257]:168[168]|9451[9454]:9537[9537]:87[84]|9898[9904]:9984[9984]:87[81]	GT15	GT15	N	GT	0	0	0	0	0	0	0	11.4152	0	0	0	0	0	0	0	0	0
A0A212J850_32522490|F8.1_k87_448654_1_1298|-|388|4.378e-107|2|2|1266|1266[1266]:535[535]:732[732]|469[469]:2[2]:468[468]	GT19	GT19	N	GT	0	0	1.01477	0	9.40869	20.3767	0	0	3.25318	4.20396	20.1446	16.4099	0	0	0	0.701833	0
A0A1Y2CPF6_32504335|P4_k87_1708637_1_1223|-|355|3.76e-97|1|92|1207|1207[1207]:92[92]:1116[1116]	GT2_Chitin_synth_1	GT2	N	GT	0	0	0.373241	0	0	0	0	0	2.79424	4.28328	1.03211	0.603953	0.899201	0.909525	3.20708	0	1.6308
A0A1Y2CPF6_32504335|F4_k87_465302_1_2016|+|352|3.008e-96|1|381|1982|381[381]:1982[1982]:1602[1602]	GT2_Chitin_synth_1	GT2	N	GT	0	0	0	0	1.36895	0	0	0.30206	11.1331	18.224	4.27485	2.33385	3.61563	1.52736	8.23729	2.27514	1.8
A0A1Y2CPF6_32504335|contig-119_74527|-|306|2.117e-82|1|79|1215|1215[1215]:79[79]:1137[1137]	GT2_Chitin_synth_1	GT2	N	GT	0	0	0	0	0	0	0	0.464341	2.57796	4.29731	0.870529	0	9.28429	4.62786	20.1	4.79141	12.7637
MMETSP1338_Transcript_24805_22920393|F4_k87_1250204_1_3689|-|442|2.43e-123|1|549|2180|2180[2180]:549[549]:1632[1632]	GT2_Chitin_synth_1	GT2	N	GT	0	0	0	0	0.334526	0.430746	0	0	10.0613	14.0403	1.00281	2.56332	0.5748	0	1.47134	0	1.77173
A0A1Y2CPF6_32504335|F4_k87_1137094_1_5548|-|357|9.401e-98|1|3680|5356|5356[5356]:3680[3680]:1677[1677]	GT2_Chitin_synth_1	GT2	N	GT	0	0	0.221622	0	0.970767	0.416702	0	0	12.045	19.1837	4.03427	2.20655	5.75359	5.0596	19.8767	3.25609	13.9875
A0A1Y2CPF6_32504335|contig-119_39566|-|357|9.401e-98|1|295|1557|1557[1557]:295[295]:1263[1263]	GT2_Chitin_synth_1	GT2	N	GT	0	0	0	0	0	0	0	0	5.28031	6.0997	1.37388	0	4.67632	3.8806	14.6946	3.60353	7.36925
MMETSP1338_Transcript_24805_22920393|F4_k87_1330617_1_4118|+|449|1.899e-125|1|1160|2713|1160[1160]:2713[2713]:1554[1554]	GT2_Chitin_synth_1	GT2	N	GT	0	0	0	0	0	0	0	0	8.00941	12.9071	2.32588	1.78142	0	0	0	0	0
A0A1Y2CPF6_32504335|contig-119_40082|-|349|2.407e-95|1|5|1417|1417[1417]:5[5]:1413[1413]	GT2_Chitin_synth_1	GT2	N	GT	0	0	0	0	0.400381	0.515259	0	0	1.86333	4.07551	1.39798	0	5.71896	4.89885	16.1185	3.31841	5.58174
ERR1719238_1322479|F8.1_k87_1199723_1_1081|-|212|4.193e-54|1|1|837|837[837]:1[1]:837[837]	GT2_Chitin_synth_1	GT2	N	GT	0	0	0	0	0	0	0	0	4.79662	10.127	4.07163	4.80218	0	0	0	0	0
ERR1719183_405683|contig-119_4633|+|802|1.035e-231|10|1370|5998|1370[1370]:1681[1681]:312[312]|1913[1925]:2059[2059]:147[135]|2324[2324]:2407[2407]:84[84]|2639[2639]:2725[2725]:87[87]|3007[3010]:3099[3099]:93[90]|3489[3492]:3635[3635]:147[144]|4004[4010]:4231[4231]:228[222]|4596[4602]:4751[4751]:156[150]|5009[5012]:5083[5083]:75[72]|5933[5933]:5998[5998]:66[66]	GT2_Glyco_tranf_2_3	GT2	GT2	GT	0	0	0	0	0	0	0	4.05391	0	0	0	0	0	0	0	0	0
ERR1719183_405683|contig-119_9325|-|697|4.197e-200|9|2369|6558|6558[6558]:6454[6454]:105[105]|5839[5845]:5702[5702]:138[132]|5132[5132]:4944[4944]:189[189]|4486[4492]:4331[4331]:156[150]|4119[4131]:3892[3892]:228[216]|3611[3617]:3540[3540]:72[66]|3304[3304]:3227[3227]:78[78]|2972[2978]:2745[2745]:228[222]|2434[2446]:2369[2369]:66[54]	GT2_Glyco_trans_2_3	GT2	GT2	GT	0	0	0	0	0	0	0	9.40089	0	0	0	0	0	0	0.264311	0	0
A0A0S4KUK5_10383000|contig-119_16305|-|401|5.344e-111|6|2794|4812|4812[4812]:4741[4741]:72[72]|4504[4513]:4400[4400]:105[96]|4087[4087]:4010[4010]:78[78]|3674[3674]:3498[3498]:177[177]|3259[3265]:3098[3098]:162[156]|2874[2889]:2794[2794]:81[66]	GT2_Glycos_transf_2	GT2	N	GT	0	0	0	0	0	0	0	6.4546	0	0	0	0	0	0	0	0	0
MMETSP0017_Transcript_2514_5772406|F4_k87_1425990_1_3410|-|363|1.469e-99|2|56|884|884[884]:801[801]:84[84]|739[742]:56[56]:684[681]	GT2_Glycos_transf_2	GT2	N	GT	0	0	0	0	0.958978	0	0	0	12.6038	18.3162	2.38114	4.68007	9.64789	5.01856	20.9607	5.23767	9.76041
B8A9F5_29941142|contig-119_1694|+|1312|0|14|15399|21015|15399[15399]:15503[15503]:105[105]|15696[15717]:15794[15794]:99[78]|15977[15989]:16069[16069]:93[81]|16187[16190]:16300[16300]:114[111]|16567[16591]:16803[16803]:237[213]|17071[17074]:17286[17286]:216[213]|17428[17431]:17580[17580]:153[150]|17858[17861]:18088[18088]:231[228]|18367[18367]:18567[18567]:201[201]|18833[18836]:18988[18988]:156[15…	GT20	GT20	GT20	GT	0	0	0	0	0	0	0	3.56975	0	0	0	0	0	0	0	0	0
MMETSP0817_Transcript_18000_6217313|contig-119_17696|+|457|7.416e-128|5|3952|5457|3952[3952]:4149[4149]:198[198]|4274[4274]:4345[4345]:72[72]|4593[4596]:4796[4796]:204[201]|4960[4972]:5112[5112]:153[141]|5290[5293]:5457[5457]:168[165]	GT20	GT20	N	GT	0	0	0	0	0	0	0	8.74397	0	0	0	0	0	0	0	0	0
MMETSP1128_Transcript_17950_33895704|contig-119_7540|+|1031|1.199e-300|8|17|3017|17[17]:172[172]:156[156]|292[295]:447[447]:156[153]|637[640]:855[855]:219[216]|1040[1064]:1186[1186]:147[123]|1368[1368]:1775[1775]:408[408]|1974[1974]:2144[2144]:171[171]|2447[2447]:2647[2647]:201[201]|2832[2835]:3017[3017]:186[183]	GT20	GT20	GT20	GT	0	0	0	0	0	0	0	9.00092	0	0	0	0	0	0	0	0	0
MMETSP1128_Transcript_17950_33895704|contig-119_25573|+|849|7.352e-246|6|60|2565|60[60]:455[455]:396[396]|548[548]:1345[1345]:798[798]|1429[1429]:1776[1776]:348[348]|1908[1908]:2045[2045]:138[138]|2128[2128]:2367[2367]:240[240]|2497[2500]:2565[2565]:69[66]	GT20	GT20+CBM20	GT20	GT	0	0	0	0	0	0	0.419074	0.234408	0	0	0	0	3.32909	0	0.291333	0.763517	2.72995
A0A0N1P2M2_17867703|contig-119_97823|+|712|1.281e-204|4|1|1339|1[1]:84[84]:84[84]|142[142]:516[516]:375[375]|578[578]:955[955]:378[378]|998[998]:1339[1339]:342[342]	GT20	GT20+CBM20	GT20	GT	0	0	0	0	0	0	1.57118	4.42851	0	0	0	0	0	0	0	0	0
MMETSP0819_Transcript_14394_13729550|contig-119_15683|+|569|1.428e-161|8|170|3368|170[170]:304[304]:135[135]|418[418]:522[522]:105[105]|884[884]:1381[1381]:498[498]|1466[1490]:1621[1621]:156[132]|1787[1787]:1891[1891]:105[105]|2041[2041]:2250[2250]:210[210]|2554[2560]:2715[2715]:162[156]|2988[2988]:3368[3368]:381[381]	GT22	GT22	N	GT	0	0	0	0	0	0	0	8.58921	0	0	0	0	0	0	0	0	0
MMETSP0382_Transcript_45680_18687481|contig-119_6876|-|485|2.763e-136|6|1024|3059|3059[3059]:2886[2886]:174[174]|2605[2605]:2369[2369]:237[237]|2255[2258]:2043[2043]:213[210]|1825[1837]:1637[1637]:189[177]|1486[1486]:1259[1259]:228[228]|1119[1125]:1024[1024]:96[90]	GT22	GT22	N	GT	0	0	0	0	0	0	0	5.23476	0	0	0	0	0.563462	0	0	0	0
MMETSP0819_Transcript_14394_13729550|contig-119_15203|-|343|1.54e-93|1|0|1079|1079[1079]:0[0]:1080[1080]	GT22	GT22	N	GT	0	0	0	0	0	0	0	0	0	0	0	0	2.51015	1.92022	9.34897	2.64691	3.70009
MMETSP0819_Transcript_14394_13729550|F4_k87_272001_1_4702|-|366|1.836e-100|1|287|1591|1591[1591]:287[287]:1305[1305]	GT22	GT22	N	GT	0	0	0	0	0	0	0	0	6.66159	16.2593	1.05039	3.11301	2.7013	2.35306	2.81249	0.943876	1.47432
MMETSP0819_Transcript_14394_13729550|contig-119_1501|-|403|1.336e-111|1|13814|15991|15991[15991]:13814[13814]:2178[2178]	GT22	GT22	N	GT	0	0	0	0	0	0	0	0.248338	6.01989	10.1736	1.37028	2.03199	2.54097	1.37442	11.786	2.97683	3.47111
MMETSP0382_Transcript_45680_18687481|contig-119_1324|-|223|2.047e-57|3|1661|4335|4335[4335]:4210[4210]:126[126]|4144[4144]:4016[4016]:129[129]|3088[3088]:1661[1661]:1428[1428]	GT22	GT22	N	GT	0	0	0	0	0	0	0	0	4.55573	13.9391	1.22283	0.808025	5.39211	5.12319	14.0661	4.41141	9.85472
H3C6T3_30103135|F4_k87_1658811_1_5359|-|915|9.964e-266|1|219|4490|4490[4490]:219[219]:4272[4272]	GT24	GT24	GT24	GT	0	0	0	0	0	0	0	0.432986	10.2687	9.97894	1.56859	1.62576	4.53369	3.71908	8.8072	2.90743	4.29013
ERR1719171_845407|contig-119_9916|-|443|1.215e-123|4|6797|8472|8472[8472]:8326[8326]:147[147]|7910[7913]:7746[7746]:165[162]|7406[7421]:7272[7272]:135[120]|6955[6955]:6797[6797]:159[159]	GT24	GT24	N	GT	0	0	0	0	0	0	0	10.1556	0	0	0	0	0	0	0	0	0
ERR1711871_387595|F4_k87_841227_1_1270|-|527|6.282e-149|5|271|1268|1268[1268]:1122[1122]:147[147]|1059[1062]:841[841]:219[216]|708[711]:529[529]:180[177]|457[457]:392[392]:66[66]|336[339]:271[271]:66[63]	GT24	GT24	GT24	GT	0	0	0	0	0	0	0	0	2.64836	0	0	1.1808	0	0	0	0	0
MMETSP0811_Transcript_9906_26154155|P4_k87_499359_1_1659|-|709|1.025e-203|1|228|1658|1658[1658]:228[228]:1431[1431]	GT24	GT24	GT24	GT	0	0	0	0	0	0	0	0	0	3.00181	0.98962	0	0.939491	0.374302	3.62693	0	2.91579
MMETSP0811_Transcript_9906_26154155|contig-119_2998|+|794|2.649e-229|1|855|2585|855[855]:2585[2585]:1731[1731]	GT24	GT24	GT24	GT	0	0	0.639887	0	0	0	0	0.550105	1.92808	3.34526	1.04418	0.909478	4.21351	1.01292	9.59958	3.14199	3.73403
A0A0D1ZN71_18920632|contig-119_80452|+|322|3.23e-87|2|56|890|56[56]:124[124]:69[69]|183[183]:890[890]:708[708]	N	GT25	GT25	GT	0	1.85235	0	0	0	0	6.96038	8.74397	0	0	0	0.912372	0	0	0	0	0.680684
A0A1Y1HUD4_17227105|contig-119_4833|-|637|4.839e-182|6|4794|6732|6732[6732]:6607[6607]:126[126]|6397[6400]:6131[6131]:267[264]|5989[6001]:5702[5702]:288[276]|5597[5606]:5475[5475]:123[114]|5328[5328]:5164[5164]:165[165]|5030[5033]:4794[4794]:237[234]	GT28	GT28	GT28	GT	0	0	0	0	0	0	0	7.52847	0	0	0	0	0	0	0	0	0
ERR1719376_759452|P4_k87_2697110_1_1386|-|469|1.811e-131|4|88|1384|1384[1384]:1169[1169]:216[216]|1113[1119]:892[892]:222[216]|819[819]:652[652]:168[168]|594[594]:88[88]:507[507]	GT3	GT3	N	GT	0	0	0	0	0	0	0	0	0	1.65618	0	0	0	0	0	0	0
A0A0F2R8J5_30287317|P4_k87_1784814_1_1790|-|280|1.421e-74|1|1|729|729[729]:1[1]:729[729]	GT30	GT30	N	GT	0	0	0	0	0	0	0	0	0	0	0	0	0	0	0	0	0
J9DHI0_7219328|F4_k87_2010966_1_1769|+|344|7.701e-94|1|788|1756|788[788]:1756[1756]:969[969]	GT30	GT30	N	GT	0	0	1.81582	0	13.9927	28.2348	0	0	6.81001	4.00258	32.6008	58.4798	0	0	0	0	0
MMETSP0738_Transcript_27104_30235672|F2.1_k87_1472011_1_6592|-|447|7.594e-125|1|2520|3431|3431[3431]:2520[2520]:912[912]	GT30	GT30	GT30	GT	0	0	0.495802	0	16.0255	34.2519	0	0	3.19077	2.5547	29.2417	33.3927	0	0	0	0	0
I0Z0Q1_23568709|contig-119_27980|+|502|2.108e-141|3|1041|2345|1041[1041]:1205[1205]:165[165]|1412[1412]:1627[1627]:216[216]|1794[1797]:2345[2345]:552[549]	GT32	GT32	N	GT	0	0	0	0	0	0	2.15188	7.93391	0	0	0	0	0	0	0	0	0
ERR1719483_668010|contig-119_111391|-|192|4.397e-48|3|82|1251|1251[1251]:1120[1120]:132[132]|1016[1019]:849[849]:168[165]|267[267]:82[82]:186[186]	GT33	GT33	N	GT	0	0	0	0	0	0	0	3.79873	0	0	0	0	0	0	0	0	0
ERR1719282_366350|contig-119_127103|-|325|4.038e-88|1|2|706|706[706]:2[2]:705[705]	GT33	GT33	GT33	GT	0	0	0	0	0	0	6.46163	12.9767	0	0	0	0	1.09851	0	0	0	0
A0A1Y1VC00_16523871|F4_k87_681661_1_1885|-|477|7.073e-134|1|718|1854|1854[1854]:718[718]:1137[1137]	GT33	GT33	N	GT	0	0	0	0	0	0	0	0.464341	10.5035	19.1554	4.41968	3.01869	0.571662	0.385914	3.61243	1.67367	3.23247
MMETSP0052_Transcript_12384_8825401|contig-119_30018|-|512|2.058e-144|3|106|1608|1608[1608]:1525[1525]:84[84]|1457[1460]:1308[1308]:150[147]|1242[1248]:106[106]:1137[1131]	GT33	GT33	N	GT	0	0	0	0	0	0	0	0	3.36233	2.30309	0	0.893123	8.2718	5.55788	14.0189	4.65306	7.86654
A0A1Y1VC00_16523871|P4_k87_2976811_1_3852|-|393|1.368e-108|5|104|1580|1580[1580]:1446[1446]:135[135]|1127[1127]:966[966]:162[162]|885[885]:799[799]:87[87]|745[745]:653[653]:93[93]|463[463]:104[104]:360[360]	GT33	GT33	N	GT	0	0	0	0	0	0	0	0	0	2.91603	0	0	0	0	0	1.14531	0
M3Z958_10451760|F2.1_k87_301657_1_1449|-|1150|0|1|2|1438|1438[1438]:2[2]:1437[1437]	GT35	GT35	GT35	GT	0	0	0	0	7.44658	8.07511	0	0	0	0	0	0	0	0	0	0	0
ERR1719254_872|F8.2_k87_1505333_1_1056|+|571|3.571e-162|1|1|1053|1[1]:1053[1053]:1053[1053]	GT35	GT35	GT35	GT	0	0	0	0	0	0	0	0	3.81954	7.02033	1.17152	4.1322	0	0.732932	0.368952	0.833147	0.639293
ERR1719247_386143|F4_k87_286014_1_4902|-|1097|1.62498e-320|1|2638|4899|4899[4899]:2638[2638]:2262[2262]	GT35	GT35	GT35	GT	0	0	0	0	0	0	0	0	6.72821	6.18536	1.68314	1.42942	0	0	0.188072	0	0
ERR1719247_386143|contig-119_3889|-|1310|0|13|4799|10268|10268[10268]:9987[9987]:282[282]|9748[9754]:9590[9590]:159[153]|9408[9435]:9256[9256]:153[126]|9146[9158]:9012[9012]:135[123]|8851[8860]:8666[8666]:186[177]|8409[8412]:8299[8299]:111[108]|7464[7464]:7336[7336]:129[129]|7159[7159]:6914[6914]:246[246]|6612[6612]:6334[6334]:279[279]|6043[6043]:5867[5867]:177[177]|5625[5628]:5461[5461]:165[162]…	GT35	GT35	GT35	GT	0	0	0	0	0	0	0.37603	5.71562	0	0	0	0	0	0	0	0	0
ERR1719352_876859|F8.1_k87_3311674_1_1011|+|467|7.242e-131|1|4|927|4[4]:927[927]:924[924]	GT35	GT35	N	GT	0	0	0	0	0	0	0	0	0.843116	2.87311	1.97674	0	0	0	0	0	0
ERR1719247_386143|contig-119_45353|-|859|7.18e-249|1|2|1480|1480[1480]:2[2]:1479[1479]	GT35	GT35	GT35	GT	0	0	0	0	0	0	0	0.451772	1.02518	6.15259	0.303563	0.942259	5.6517	1.87693	9.49174	3.07331	5.83279
ERR1719247_386143|contig-119_671|-|1282|0|1|4242|6851|6851[6851]:4242[4242]:2610[2610]	GT35	GT35	GT35	GT	0	0	0	0	0	0.994521	0	0.626022	2.65041	4.26181	0.199881	1.46806	6.28322	3.04554	16.9973	4.01273	6.47841
ERR1719247_386143|contig-119_13222|-|1604|0|14|1851|6899|6899[6899]:6723[6723]:177[177]|6453[6456]:6169[6169]:285[282]|5950[5956]:5777[5777]:174[168]|5617[5620]:5486[5486]:132[129]|5346[5349]:5188[5188]:159[156]|5113[5125]:4937[4937]:177[165]|4746[4752]:4555[4555]:192[186]|4335[4338]:4075[4075]:261[258]|3803[3806]:3657[3657]:147[144]|3540[3546]:3439[3439]:102[96]|3289[3289]:3098[3098]:192[192]|28…	GT35	GT35	GT35	GT	0	0	0	0	0	0	0.330284	5.86403	0	0	0	0	0	0	0	0	0
MMETSP1475_Transcript_2885_3889000|contig-119_47092|-|460|9.27e-129|1|80|1600|1600[1600]:80[80]:1521[1521]	GT39	GT39	N	GT	0	0	0.499581	0	0	0	0	0	15.1148	23.5171	4.17819	4.22879	8.75667	5.40491	23.5855	6.27379	9.77314
MMETSP1475_Transcript_2885_3889000|contig-119_706|-|468|3.621e-131|2|10737|12646|12646[12646]:12500[12500]:147[147]|12317[12326]:10737[10737]:1581[1572]	GT39	GT39	N	GT	0	0	0.215091	0	0.314337	0	0	0.277645	8.01705	5.91065	0	1.23441	3.99115	3.91054	16.7725	4.74208	7.76531
ERR1719259_549784|contig-119_38611|+|226|2.559e-58|1|58|696|58[58]:696[696]:639[639]	GT4	GT4	N	GT	0	0	0	0	0	0	0	0	1.02606	5.71851	0	0	3.90844	1.92202	5.54455	0	4.69079
A0A196S9I4_35238812|contig-119_18864|+|494|5.396e-139|3|27|1312|27[27]:146[146]:120[120]|217[226]:471[471]:255[246]|548[548]:1312[1312]:765[765]	GT4	GT4	N	GT	0	0	0	0	0	0	0	0	1.3219	0.562183	0.44148	0	2.52514	2.47723	7.03811	3.35446	8.52329
MMETSP1369_Transcript_68891_39455543|contig-119_33969|-|636|9.679e-182|1|522|1760|1760[1760]:522[522]:1239[1239]	GT4	GT4	GT4	GT	0	0	0	0	0	0	0	0	6.83355	12.6705	0	3.70147	8.85197	4.2031	19.0233	6.07231	8.99697
MMETSP0807_Transcript_11309_14234214|contig-119_1704|-|542|1.917e-153|7|5054|7250|7250[7250]:7137[7137]:114[114]|6905[6914]:6705[6705]:201[192]|6562[6565]:6431[6431]:132[129]|6310[6319]:6134[6134]:177[168]|5929[5932]:5795[5795]:135[132]|5637[5637]:5458[5458]:180[180]|5251[5254]:5054[5054]:198[195]	GT4	GT4	GT4	GT	0	0	0	0	0	0	0	5.7515	0	0	0	0	0	0	0	0	0
ERR1712135_942|contig-119_76631|+|403|1.336e-111|2|3|1147|3[3]:791[791]:789[789]|959[959]:1147[1147]:189[189]	GT4	GT4	N	GT	0	0	0	0	0	0	0	0	0	0	0	0	0	0	0	0	0
MMETSP0115_Transcript_24321_17808831|F4_k87_268707_1_7609|-|332|3.154e-90|1|2749|3723|3723[3723]:2749[2749]:975[975]	GT4	GT4	N	GT	0	0	0	0	0.660391	0	0	0.571264	19.284	25.7832	3.83364	8.37178	12.8536	4.53663	26.0579	2.77041	18.1158
ERR1712135_942|F4_k87_637951_1_1700|-|439|1.944e-122|3|2|1260|1260[1260]:1171[1171]:90[90]|1093[1093]:875[875]:219[219]|808[814]:2[2]:807[801]	GT4	GT4	N	GT	0	0	0	0	0	0.707247	0	0	7.54993	6.06935	0	0.518366	0	1.05419	2.01056	0	0.423829
ERR1712135_942|contig-119_16766|+|577|5.579e-164|8|2209|4238|2209[2209]:2301[2301]:93[93]|2387[2390]:2557[2557]:171[168]|2681[2681]:2761[2761]:81[81]|2836[2848]:2997[2997]:162[150]|3106[3115]:3309[3309]:204[195]|3406[3406]:3579[3579]:174[174]|3715[3721]:3966[3966]:252[246]|4125[4134]:4238[4238]:114[105]	GT4	GT4	GT4	GT	0	0	0	0	0	0	0	2.99119	0	0	0	0	0	0	0	0	0
B0LSR0_36107846|contig-119_21732|+|368|4.59e-101|6|513|2536|513[513]:746[746]:234[234]|1135[1138]:1191[1191]:57[54]|1478[1478]:1576[1576]:99[99]|1863[1869]:2024[2024]:162[156]|2239[2245]:2295[2295]:57[51]|2468[2468]:2536[2536]:69[69]	GT4	GT4	N	GT	0	0	0	0	0	0	0	3.07896	0	0	0	0	0	0	0	0	0
ERR1712135_942|contig-119_4975|-|528|3.141e-149|3|3309|4788|4788[4788]:4699[4699]:90[90]|4621[4621]:3836[3836]:786[786]|3668[3668]:3309[3309]:360[360]	GT4	GT4	N	GT	0	0	0	0	0	0	0	0	3.22271	5.37414	0	0.565065	0	1.00828	5.2287	2.67744	2.58015
ERR1712135_942|contig-119_66728|-|456|1.483e-127|2|2|1320|1320[1320]:1231[1231]:90[90]|1153[1153]:2[2]:1152[1152]	GT4	GT4	N	GT	0	0	0	0	0	0	0	1.24231	0.545563	1.89326	1.17849	0	6.7311	2.6817	9.02998	1.72877	2.04535
ERR1712135_942|contig-119_8528|-|506|1.317e-142|2|4978|6458|6458[6458]:6369[6369]:90[90]|6291[6291]:4978[4978]:1314[1314]	GT4	GT4	N	GT	0	0	0	0	1.61458	0	0	0	11.8883	9.3221	0	4.25396	2.54744	2.02144	6.08752	1.42084	6.69501
A0A196S9I4_35238812|F4_k87_1584971_1_6110|+|552|1.872e-156|3|2436|4006|2436[2436]:2840[2840]:405[405]|2911[2920]:3165[3165]:255[246]|3242[3242]:4006[4006]:765[765]	GT4	GT4	N	GT	0	0	0	0	0.798608	0	0	0	7.70974	13.1362	0.99788	2.72349	1.91555	0	4.81721	1.46721	2.91186
A0A196S9I4_35238812|contig-119_57452|+|362|2.938e-99|2|10|997|10[10]:156[156]:147[147]|233[233]:997[997]:765[765]	GT4	GT4	N	GT	0	0	0	0	0	0	0	0	0.586602	0	0	0	0	0	6.34891	0	0
M0Z082_1921149|contig-119_48025|+|423|1.274e-117|5|123|2395|123[123]:227[227]:105[105]|583[598]:819[819]:237[222]|1280[1283]:1498[1498]:219[216]|1833[1833]:1997[1997]:165[165]|2258[2258]:2395[2395]:138[138]	N	GT4	GT4	GT	0	0	0	0	0	0	0	6.9945	0	0	0	0	0	0	0	0	0
MMETSP1128_Transcript_26547_28294581|contig-119_6896|+|597|5.321e-170|5|6410|8469|6410[6410]:6574[6574]:165[165]|6787[6787]:7017[7017]:231[231]|7241[7244]:7564[7564]:324[321]|7761[7761]:7964[7964]:204[204]|8236[8239]:8469[8469]:234[231]	GT41	GT41	GT41	GT	0	0	0	0	0	0	0	9.12861	0	0	0	0	0	0	0	0	0
MMETSP0258_Transcript_5367_5650111|contig-119_14330|+|694|3.358e-199|6|563|2819|563[563]:862[862]:300[300]|1018[1027]:1194[1194]:177[168]|1327[1333]:1533[1533]:207[201]|1828[1828]:2142[2142]:315[315]|2311[2317]:2448[2448]:138[132]|2634[2634]:2819[2819]:186[186]	N	GT41	GT41	GT	0	0	0	0	0	0	0	5.79006	0	0	0	0	0	0	0	0	0
ERR1719198_2572593|P4_k87_2056233_1_2620|-|574|4.463e-163|1|973|2484|2484[2484]:973[973]:1512[1512]	N	GT41	GT41	GT	0	0	0	0	0	0	0	0.323975	9.71781	11.2879	2.17746	3.94024	2.49754	2.51085	5.6704	2.10633	2.68981
MMETSP1328_Transcript_7779_5940107|F4_k87_752209_1_5798|-|748|1.864e-215|1|2096|4099|4099[4099]:2096[2096]:2004[2004]	N	GT41	GT41	GT	0	0	0	0	0	0	0	0.307505	13.7399	19.5223	4.34824	2.80129	7.29223	4.00165	22.0651	6.42281	7.58453
MMETSP1328_Transcript_7779_5940107|contig-119_15069|-|614|4.059e-175|1|341|2287|2287[2287]:341[341]:1947[1947]	N	GT41	GT41	GT	0	0	0	0	0	0	0	0	7.43377	6.25622	2.34403	0	2.31741	0	7.65732	0	3.26274
MMETSP1333_Transcript_6266_16829052|contig-119_10892|-|483|1.105e-135|11|2275|7730|7730[7730]:7584[7584]:147[147]|7474[7486]:7403[7403]:72[60]|6414[6414]:6253[6253]:162[162]|5999[5999]:5916[5916]:84[84]|5830[5851]:5726[5726]:105[84]|5551[5554]:5480[5480]:72[69]|4927[4927]:4826[4826]:102[102]|4553[4553]:4479[4479]:75[75]|3926[3926]:3753[3753]:174[174]|3111[3111]:2962[2962]:150[150]|2454[2454]:2275…	GT47	GT47	N	GT	0	0	0	0	0	0	0	6.33207	0	0	0	0	0	0	0	0	0
MMETSP0033_Transcript_22653_22654181|contig-119_8431|+|857|2.872e-248|8|4862|7405|4862[4862]:4966[4966]:105[105]|5234[5234]:5353[5353]:120[120]|5462[5465]:5686[5686]:225[222]|5812[5839]:5958[5958]:147[120]|6060[6069]:6290[6290]:231[222]|6403[6406]:6459[6459]:57[54]|6547[6553]:6681[6681]:135[129]|6809[6815]:7405[7405]:597[591]	GT5	GT5	GT5	GT	0	0	0	0	0	0	0.554733	7.46836	0	0	0	0	0	0	0	0	0
A0A0K9RS89_2924251|contig-119_6277|+|967|2.212e-281|12|2814|7963|2814[2814]:2960[2960]:147[147]|3417[3420]:3590[3590]:174[171]|3922[3928]:4032[4032]:111[105]|4404[4410]:4505[4505]:102[96]|4694[4694]:4798[4798]:105[105]|4893[4905]:5003[5003]:111[99]|5230[5233]:5352[5352]:123[120]|5680[5680]:5772[5772]:93[93]|6107[6107]:6199[6199]:93[93]|6780[6783]:6911[6911]:132[129]|7208[7220]:7354[7354]:147[135]…	GT5	GT5	GT5	GT	0	0	0	0	0	0	0	5.28586	0	0	0	0	0	0	0	0	0
K4BBV6_26871469|contig-119_11690|+|801|2.069e-231|7|171|3399|171[171]:599[599]:429[429]|925[928]:999[999]:75[72]|1194[1194]:1346[1346]:153[153]|1697[1697]:1909[1909]:213[213]|2154[2163]:2333[2333]:180[171]|2615[2618]:2791[2791]:177[174]|3157[3157]:3399[3399]:243[243]	GT5	GT5	GT5	GT	0	0	0	0	0	0	0	5.09366	0	0	0	0	0	0	0	0	0
MMETSP1468_Transcript_45401_8154027|contig-119_1712|-|696|8.395e-200|10|6172|9826|9826[9826]:9755[9755]:72[72]|9609[9612]:9460[9460]:150[147]|9179[9179]:9006[9006]:174[174]|8794[8803]:8693[8693]:102[93]|8500[8500]:8408[8408]:93[93]|8216[8219]:8106[8106]:111[108]|7830[7845]:7705[7705]:126[111]|7514[7514]:7389[7389]:126[126]|6792[6792]:6682[6682]:111[111]|6342[6342]:6172[6172]:171[171]	GT5	GT5+CBM53	GT5	GT	0	0	0	0	0	0	0	4.30056	0	0	0	0	0	0	0	0	0
E6ZI90_10764406|contig-119_82530|+|369|2.295e-101|1|84|1280|84[84]:1280[1280]:1197[1197]	GT50	GT50	N	GT	0	0	0	0	0	0	0	0.434238	5.57993	10.6429	0.653301	0	10.6455	4.5875	20.5847	5.98766	9.30657
E6ZI90_10764406|F4_k87_282165_1_4195|+|410|1.044e-113|1|2647|3984|2647[2647]:3984[3984]:1338[1338]	GT50	GT50	N	GT	0	0	0	0	0	0	0	0	7.47077	6.86467	0.465992	3.15232	0	0	0.457778	0	0
A0A098TBW6_749070|P4_k87_2987940_1_1002|-|244|9.763e-64|1|1|573|573[573]:1[1]:573[573]	GT51	GT51	N	GT	0	0	6.58436	0	35.9638	31.2343	0	0	8.35546	4.14398	55.1734	94.3024	0	0	0	0	0
MMETSP0818_Transcript_29544_31170933|contig-119_118765|+|314|8.269e-85|4|223|1242|223[223]:354[354]:132[132]|481[481]:633[633]:153[153]|747[747]:908[908]:162[162]|1057[1063]:1242[1242]:186[180]	GT57	GT57	N	GT	0	0	0	0	0	0	0	16.9533	0	0	0	0	0	0	0	0	0
MMETSP0818_Transcript_29544_31170933|F4_k87_2175946_1_1815|-|251|7.627e-66|2|167|861|861[861]:706[706]:156[156]|643[652]:167[167]:477[468]	GT57	GT57	N	GT	0	0	0	0	0	0	0	0	8.35799	10.6222	0	4.03699	1.35634	2.00134	4.88759	0	2.93715
MMETSP0109_Transcript_7044_32231085|contig-119_45303|+|380|1.121e-104|2|390|1873|390[390]:545[545]:156[156]|608[617]:1873[1873]:1266[1257]	GT57	GT57	N	GT	0	0	0	0	0	0	0	0	4.91608	7.92673	1.08414	2.19959	7.38672	2.56836	10.9966	0.571895	3.02248
ERR1719481_381682|contig-119_6047|-|657|4.615e-188|9|1374|4869|4869[4869]:4705[4705]:165[165]|4575[4575]:4423[4423]:153[153]|4230[4233]:4060[4060]:171[168]|3732[3735]:3589[3589]:144[141]|3305[3323]:3168[3168]:138[120]|3012[3036]:2854[2854]:159[135]|2496[2499]:2335[2335]:162[159]|2108[2111]:1932[1932]:177[174]|1505[1505]:1374[1374]:132[132]	GT57	GT57	GT57	GT	0	0	0	0	0	0	0	8.22089	0	0	0	0	0	0	0	0	0
A0A024ULX5_26183597|contig-119_28444|+|222|4.095e-57|1|4|1029|4[4]:1029[1029]:1026[1026]	GT57	GT57	N	GT	0.545503	0	0	0	0	0	0	0	7.15224	10.1848	2.92374	1.41381	3.34112	5.52421	10.0791	1.72357	5.9375
MMETSP0109_Transcript_7044_32231085|F4_k87_739806_1_1005|+|432|2.488e-120|1|95|1003|95[95]:1003[1003]:909[909]	GT57	GT57	N	GT	0	0	0	0	0	0	0	0	7.48186	0.366775	0.60678	0	0	0	0	0	0
ERR1719481_381682|F4_k87_1517765_1_8171|+|460|9.27e-129|2|2502|4209|2502[2502]:2627[2627]:126[126]|2692[2692]:4209[4209]:1518[1518]	GT57	GT57	N	GT	0	0	0	0	0	0	0	0	10.0294	17.0532	2.71135	2.90675	6.68497	2.85471	17.0817	2.49518	5.75409
A0A0W4ZFJ7_6179434|F4_k87_688496_1_1472|+|174|1.153e-42|1|855|1466|855[855]:1466[1466]:612[612]	GT58	GT58	N	GT	0	0	0	0	0	0	0	1.18637	5.40141	19.7159	3.19139	5.12158	0	0	0	5.81335	0
A0A0W4ZFJ7_6179434|P4_k87_2254225_1_1558|+|313|1.654e-84|5|0|986|0[0]:134[134]:135[135]|215[215]:373[373]:159[159]|440[440]:592[592]:153[153]|684[684]:818[818]:135[135]|867[876]:986[986]:120[111]	GT58	GT58	N	GT	0	0	0	0	0	0	0	0	0	2.28735	0	0	0	0	0	0	0
A0A0W4ZFJ7_6179434|contig-119_93420|-|222|4.095e-57|1|2|1006|1006[1006]:2[2]:1005[1005]	GT58	GT58	N	GT	0	0	0	0	0	0	0	0.544939	7.45365	10.104	2.25047	1.19732	3.75752	2.46312	7.57944	2.61553	5.26535
A0A0W4ZFJ7_6179434|contig-119_2079|+|288|5.549e-77|1|5669|6922|5669[5669]:6922[6922]:1254[1254]	GT58	GT58	N	GT	0	0	0	0	0	0	0	0	0	0	0	0	5.42791	2.49647	16.8506	2.62832	7.64441
A0A0W4ZFJ7_6179434|contig-119_9199|-|446|1.519e-124|7|6484|8884|8884[8884]:8831[8831]:54[54]|8724[8724]:8533[8533]:192[192]|8366[8369]:8259[8259]:108[105]|8070[8070]:7975[7975]:96[96]|7704[7704]:7477[7477]:228[228]|7051[7051]:6959[6959]:93[93]|6639[6639]:6484[6484]:156[156]	GT58	GT58	N	GT	0	0	0	0	0	0	0	3.07956	0	0	0	0	0	0	0	0	0
ERR1719357_707177|contig-119_3063|+|479|1.768e-134|1|2016|3188|2016[2016]:3188[3188]:1173[1173]	GT58	GT58	N	GT	0	0	0	0	1.53366	0	0	0	14.4609	16.0223	0	0	8.08253	3.15127	18.1552	1.5312	9.25584
ERR1719195_2064602|contig-119_95764|+|756|7.281e-218|2|43|1451|43[43]:264[264]:222[222]|312[321]:1451[1451]:1140[1131]	GT66	GT66	GT66	GT	0	0	0	0	0	0	4.62667	4.54076	0	0	0	0	0	0	0	0	0
ERR1711971_1529141|P4_k87_469100_1_1529|-|561|3.656e-159|2|2|1053|1053[1053]:925[925]:129[129]|847[847]:2[2]:846[846]	GT66	GT66	GT66	GT	0	0	0	0	0	0	0	0	0	4.62775	0	0	0	0	0	0	0
MMETSP1160_Transcript_17094_643081|contig-119_31745|-|786|6.781e-227|3|240|2352|2352[2352]:1642[1642]:711[711]|1554[1554]:1219[1219]:336[336]|1112[1115]:240[240]:873[870]	GT66	GT66	GT66	GT	0	0	0	0	0	0	10.083	2.27991	0	0	0	0	12.0197	1.12485	1.29034	0.513202	16.413
A0A218XIB9_27597396|contig-119_8181|-|1053|2.86e-307|13|5873|9738|9738[9738]:9532[9532]:207[207]|9287[9287]:9075[9075]:213[213]|8986[8992]:8918[8918]:69[63]|8837[8840]:8700[8700]:138[135]|8561[8561]:8460[8460]:102[102]|8346[8346]:8218[8218]:129[129]|8058[8064]:7825[7825]:234[228]|7671[7674]:7579[7579]:93[90]|7278[7278]:7057[7057]:222[222]|6819[6819]:6622[6622]:198[198]|6478[6490]:6359[6359]:120[1…	GT66	GT66	GT66	GT	0	0	0	0	0	0	0	2.96718	0	0	0	0	0	0	0	0	0
ERR1711971_1529141|contig-119_13902|+|516|1.287e-145|2|3256|4582|3256[3256]:3336[3336]:81[81]|3614[3614]:4582[4582]:969[969]	GT66	GT66	GT66	GT	0	0	0	0	0	0	0	0	0	0	0	0	0	0	0	0	3.11271
ERR1711971_1529141|P4_k87_2670069_1_4404|-|591|3.405e-168|2|5|1493|1493[1493]:1413[1413]:81[81]|1135[1135]:5[5]:1131[1131]	GT66	GT66	GT66	GT	0	0	0	0	0	0	0	0	10.5791	12.0886	2.02472	0	0	0	0	0	0
MMETSP1160_Transcript_17094_643081|contig-119_25843|-|944|1.856e-274|4|268|3548|3548[3548]:2832[2832]:717[717]|2744[2744]:2583[2583]:162[162]|2506[2509]:2204[2204]:303[300]|1992[1992]:268[268]:1725[1725]	GT66	GT66	GT66	GT	1.91975	4.6696	0	0	0	0	29.5419	3.99001	0	0	0	0	29.3061	3.02233	2.04776	7.43013	44.9561
MMETSP1160_Transcript_17094_643081|contig-119_543|+|1303|0|2|18464|21317|18464[18464]:18547[18547]:84[84]|18813[18813]:21317[21317]:2505[2505]	GT66	GT66	GT66	GT	0	0	0	0	0.389264	0	0	1.0405	7.3171	9.75558	1.88015	3.92156	9.13332	4.80992	22.5795	6.27041	4.59238
MMETSP1452_Transcript_18679_16016874|P4_k87_195378_1_1498|+|604|4.157e-172|1|152|1336|152[152]:1336[1336]:1185[1185]	N	GT66	GT66	GT	0	0	0	0	0	0.647526	0	0	12.3807	14.8973	1.42292	5.11231	1.27684	0.817022	1.84473	0	1.63843
MMETSP1160_Transcript_17094_643081|contig-119_8369|-|653|7.384e-187|1|5365|6864|6864[6864]:5365[5365]:1500[1500]	N	GT66	GT66	GT	0	0	0	0	0	0	0	0	0	0	0	0	5.05081	0	4.86863	0.972048	6.95644
D0N7S5_24345720|contig-119_18926|+|280|1.421e-74|1|1124|1780|1124[1124]:1780[1780]:657[657]	GT7	GT7	N	GT	0	0	0	0	0	0	0	8.33831	0	0	0	0	0	0	0	0	0
A0A1R3IBE6_28733942|contig-119_15559|+|753|5.825e-217|6|824|2855|824[824]:1099[1099]:276[276]|1217[1220]:1444[1444]:228[225]|1582[1585]:1683[1683]:102[99]|1874[1886]:2026[2026]:153[141]|2260[2263]:2466[2466]:207[204]|2718[2724]:2855[2855]:138[132]	GT75	GT75	GT75	GT	0	0	0	0	0	0	0	7.48391	0	0	0	0	0	0	0	0	0
A0A087SDR3_23411587|contig-119_3979|+|482|2.21e-135|5|4797|6762|4797[4797]:4991[4991]:195[195]|5264[5273]:5479[5479]:216[207]|5945[5960]:6136[6136]:192[177]|6339[6342]:6440[6440]:102[99]|6616[6616]:6762[6762]:147[147]	GT77	GT77	N	GT	0	0	0	0	0	0	0	5.80786	0	0	0	0	0	0	0	0	0
MMETSP1391_Transcript_36561_21614957|contig-119_2108|-|792|1.06e-228|9|683|3307|3307[3307]:3194[3194]:114[114]|3084[3090]:3001[3001]:84[78]|2906[2930]:2832[2832]:75[51]|2508[2508]:2278[2278]:231[231]|2083[2083]:1832[1832]:252[252]|1659[1662]:1558[1558]:102[99]|1339[1342]:1226[1226]:114[111]|1149[1149]:961[961]:189[189]|760[769]:683[683]:78[69]	GT95	GT95	N	GT	0	0	0	0	0	0	0	3.04955	0	0	0	0	0	0	0	0	0
I0YYI0_6792858|contig-119_5990|-|1712|0|18|98|8121|8121[8121]:7744[7744]:378[378]|7623[7623]:7309[7309]:315[315]|7180[7183]:7046[7046]:135[132]|6842[6845]:6660[6660]:183[180]|6480[6483]:6211[6211]:270[267]|6020[6020]:5847[5847]:174[174]|5616[5631]:5425[5425]:192[177]|5233[5242]:4520[4520]:714[705]|4347[4356]:4186[4186]:162[153]|3973[3973]:3806[3806]:168[168]|2696[2696]:2238[2238]:459[459]|2071[20…	GT96	GT96	GT96	GT	0	0	0	0	0	0	0	8.34314	0	0	0	0	0	0	0	0	0
MMETSP1473_Transcript_1879_12907818|contig-119_2226|+|564|4.571e-160|8|13652|16710|13652[13652]:13771[13771]:120[120]|14101[14101]:14292[14292]:192[192]|14727[14727]:14858[14858]:132[132]|15064[15070]:15159[15159]:96[90]|15326[15329]:15472[15472]:147[144]|15643[15643]:15807[15807]:165[165]|16102[16105]:16242[16242]:141[138]|16624[16624]:16710[16710]:87[87]	GT96	GT96	GT96	GT	0	0	0	0	0	0	0	9.58673	0	0	0	0	0	0	0	0	0
MMETSP0818_Transcript_20447_30375586|contig-119_4408|+|234|9.997e-61|5|199|1964|199[199]:291[291]:93[93]|491[491]:649[649]:159[159]|881[884]:1063[1063]:183[180]|1215[1215]:1334[1334]:120[120]|1764[1764]:1964[1964]:201[201]	GT96	GT96	N	GT	0	0	0	0	0	0	0	6.67616	0	0	0	0	0	0	0	0	0
MMETSP1473_Transcript_1879_12907818|contig-119_23313|+|436|1.555e-121|7|881|3138|881[881]:1012[1012]:132[132]|1101[1104]:1259[1259]:159[156]|1335[1356]:1511[1511]:177[156]|1613[1616]:1744[1744]:132[129]|1839[1857]:2477[2477]:639[621]|2594[2594]:2725[2725]:132[132]|3055[3055]:3138[3138]:84[84]	GT96	GT96	N	GT	0	0	0	0	0	0	0	8.82498	0	0	0	0	0	0	0	0	0
MMETSP0803_Transcript_7831_39027959|contig-119_10442|-|570|7.142e-162|7|4334|6449|6449[6449]:6249[6249]:201[201]|6095[6095]:5967[5967]:129[129]|5860[5860]:5762[5762]:99[99]|5614[5614]:5489[5489]:126[126]|5382[5385]:5140[5140]:243[240]|4990[4990]:4754[4754]:237[237]|4552[4552]:4334[4334]:219[219]	GT13	N	GT13	GT	0	0	0	0	0	0	0	3.2824	0	0	0	0	0	0	0	0	0
G2QIH6_14276604|contig-119_112688|-|521|4.02e-147|1|335|1288|1288[1288]:335[335]:954[954]	GT2_Glyco_tranf_2_3	N	GT2	GT	0	0	0	0	0	1.75025	1.03893	8.8326	0	0	0	0	0	0.519495	0	0	0
A0A1N6WHY2_27156374|F4_k87_1272782_1_1794|+|619|1.269e-176|1|405|1664|405[405]:1664[1664]:1260[1260]	GT4	N	GT4	GT	0	1.11675	0	0	5.6603	1.92051	0.722194	0	3.84204	11.1659	5.83624	3.22994	0.481321	0	0	0	0
A0A059G2E8_26609012|F8.2_k87_520429_1_1184|+|284|8.879e-76|1|0|704|0[0]:704[704]:705[705]	GT4	N	GT4	GT	1.87714	2.15501	0.745296	0	5.50619	11.2716	0	0	8.04157	13.3107	18.2121	12.9041	0	0	0	0	0.793251
MMETSP0942_Transcript_16090_25346277|F4_k87_1387676_1_2228|-|715|1.601e-205|1|327|1814|1814[1814]:327[327]:1488[1488]	GT5	N	GT5	GT	0	0	0	0	0	0	0	0	8.16538	13.9712	1.42308	2.3672	0.601958	0.291489	4.08037	2.86102	2.99256
ERR1712137_181216|P4_k87_741691_1_1474|-|1127|0|1|5|1471|1471[1471]:5[5]:1467[1467]	GT5	N	GT5	GT	0	0	0	5.50705	0	0	0	0	0.836116	5.14039	0.317248	0	0	0	0	0.546255	0.288434
MMETSP1089_Transcript_12033_37310376|contig-119_44|+|1085|6.658e-317|1|62735|69004|62735[62735]:69004[69004]:6270[6270]	GT5	N	GT5	GT	0	0.158121	0.051299	0	0.373326	0.481426	0.120538	0.602997	11.1029	13.1454	4.35894	3.99031	6.30374	4.93874	21.2172	4.12749	10.1047
MMETSP0942_Transcript_16090_25346277|contig-119_74348|-|624|3.964e-178|1|43|1377|1377[1377]:43[43]:1335[1335]	GT5	N	GT5	GT	0	0	0	0	0.429101	0	0	0	0	0	0	0	5.28474	0	6.07873	0	3.06921
MMETSP0803_Transcript_24594_2910775|contig-119_26423|-|693|6.716e-199|8|46|2731|2731[2731]:2579[2579]:153[153]|2422[2422]:2150[2150]:273[273]|2049[2049]:1975[1975]:75[75]|1888[1891]:1610[1610]:279[276]|1366[1366]:1184[1184]:183[183]|908[908]:747[747]:162[162]|510[525]:334[334]:177[162]|123[126]:46[46]:78[75]	GT77	N	GT77	GT	0	0	0	0	0	0	0	4.80353	0	0	0	0	0	0	0	0	0
MMETSP0818_Transcript_20447_30375586|contig-119_2688|+|424|6.37e-118|8|14878|17554|14878[14878]:15048[15048]:171[171]|15154[15154]:15261[15261]:108[108]|15444[15456]:15575[15575]:132[120]|15717[15723]:15809[15809]:93[87]|16007[16007]:16171[16171]:165[165]|16422[16425]:16610[16610]:189[186]|16963[16963]:17079[17079]:117[117]|17453[17453]:17554[17554]:102[102]	GT96	N	GT96	GT	0	0	0	0	0	0	0	5.63511	0	0	0	0	0	0	0	0	0
ERR1712183_66039|F4_k87_29309_1_1394|-|698|2.099e-200|1|172|1389|1389[1389]:172[172]:1218[1218]	PL1_1	PL1	PL1_1	PL	0	0	0	0	0	0	0	0	9.21363	0	5.64303	0	0	0	0	0	0
ERR1712183_66039|F4_k87_1097948_1_1457|+|735|1.527e-211|1|141|1454|141[141]:1454[1454]:1314[1314]	PL1_1	PL1	PL1_1	PL	0	0	0	0	0	0	0	0	6.09507	0	4.74504	0	0	0	0	0	0
ERR1712137_957673|P4_k87_2078872_1_1016|+|398|4.275e-110|1|126|833|126[126]:833[833]:708[708]	PL7_4	PL7	N	PL	0	0	0	0	0	0	0	0	0	6.05514	0	0	0	0	0	0	0
